# Supplementary material for: Scope of tetrazolo[1,5-a]quinoxalines in CuAAC reactions for the synthesis of triazoloquinoxalines, imidazoloquinoxalines, and rhenium complexes thereof
Source: Beilstein J Org Chem. 2022 Aug 24;18:1088–99. doi: 10.3762/bjoc.18.111 (PMC9443424; doi:10.3762/bjoc.18.111)
Supplement: File 3 — Information on the availability of the data and the physical material of the target compounds. [file Beilstein_J_Org_Chem-18-1088-s003.xlsx]

## Sheet: readme
readme
sheet name	content/explanation
sample_sorted	Assignment of the obtained target compounds (given in SMILES, column D) to the labels used in the manuscript (column A), the original label of the obtained sample in the electronic lab journal (column B), the label of the compound as submitted to the Molecule Archive (column C), and the DOI (column E) as well as DOI link (column F) to the samples' data in the repository chemotion. The entries wer…
sample_structures	Assignment of the obtained target compounds (given in SMILES, column D) to the labels used in the manuscript (column A), the original label of the obtained sample in the electronic lab journal (column B), the label of the compound as submitted to the Molecule Archive (column C), and the DOI (column E) as well as DOI link (column F) to the samples' data in the repository chemotion. Content identic…
sample_analyses	Assignment of the obtained target compounds (added with labjournal IDs, column A, lab journal Chemotion ELN) to the DOI of each measurement that was made (column C, refers to the DOI in Chemotion Repository). Column F gives the type of measurement as defined by the CHMO ontology. Column B gives the assignment to all samples that are available in the Molecule Archive. Measurements to characterize …
Molecule Archive	infrastructure to store and preserve physical materials as a reaction outcome. The stored samples can be requested for different purposes, e.g. as reference compound. The molecule archive has an internal labelling system: the label consists of the letter X and a specific unique number (e.g. sample number: X11111)	https://compound-platform.eu/home
Chemotion ELN	the ELN Chemotion is an Electronic Lab Notebook to record and manage scientific data	https://www.chemotion.net/chemotionsaurus/index.html
Chemotion Repository	a repository for the deposition and disclosure of research data in the field of chemistry	https://www.chemotion-repository.net/welcome
CHMO ontology	Chemical Methods Ontology, used to describe the measurements that are used to characterize the obtained compounds	https://www.ebi.ac.uk/ols/ontologies/chmo

## Sheet: sample_sorted
Manuscript number	sample name	sample external label	canonical smiles	doi	url
12	LSH-R156-A	X15500	NNc1nc2ccccc2nc1Cl	10.14272/RODNZCIFRICALV-UHFFFAOYSA-N.2	https://dx.doi.org/10.14272/RODNZCIFRICALV-UHFFFAOYSA-N.2
24	LSH-R47-A	X12439	c1ccc2c(c1)n1nnnc1c1n2nnn1	10.14272/CXZSDEGQLBZWEC-UHFFFAOYSA-N.1	https://dx.doi.org/10.14272/CXZSDEGQLBZWEC-UHFFFAOYSA-N.1
29	LSH-R437-A	X19190	CCN(CCc1nnn(c1)c1cnc2c(n1)cccc2)CC.[C-]#[O+].[C-]#[O+].[C-]#[O+].Br[Re]	10.14272/LHPVGPJSNAKQBR-UHFFFAOYSA-M.1	https://dx.doi.org/10.14272/LHPVGPJSNAKQBR-UHFFFAOYSA-M.1
30	LSH-R444-A	X19160	CCCCc1nnn(c1)c1nc2ccccc2n2c1ncc2CCCC.[C-]#[O+].[C-]#[O+].[C-]#[O+].Br[Re]	10.14272/IYHBIYUJPQGBCO-UHFFFAOYSA-M.1	https://dx.doi.org/10.14272/IYHBIYUJPQGBCO-UHFFFAOYSA-M.1
10a	LSH-R204-A	X16026	Clc1cnc2c(n1)cccc2	10.14272/BYHVGQHIAFURIL-UHFFFAOYSA-N.2	https://dx.doi.org/10.14272/BYHVGQHIAFURIL-UHFFFAOYSA-N.2
10b	LSH-R54-A	X12532	Cc1nc2ccccc2nc1Cl	10.14272/PXDLUYLWPJMGJA-UHFFFAOYSA-N.1	https://dx.doi.org/10.14272/PXDLUYLWPJMGJA-UHFFFAOYSA-N.1
10c	LSH-R326-A	X17790	CC(c1nc2ccccc2nc1Cl)C	10.14272/ZRDHYUMEEXJHJN-UHFFFAOYSA-N.1	https://dx.doi.org/10.14272/ZRDHYUMEEXJHJN-UHFFFAOYSA-N.1
10d	LSH-R94-A	X13151	Clc1nc2ccccc2nc1C(F)(F)F	10.14272/DSMMAQWRRJQVTQ-UHFFFAOYSA-N.1	https://dx.doi.org/10.14272/DSMMAQWRRJQVTQ-UHFFFAOYSA-N.1
10e	JPK-R14-A	X11411	Clc1nc2ccccc2nc1c1ccccc1	10.14272/KPGPIQKEKAEAHM-UHFFFAOYSA-N.1	https://dx.doi.org/10.14272/KPGPIQKEKAEAHM-UHFFFAOYSA-N.1
10f	LSH-R44-A	X12521	Clc1nc2ccccc2nc1Cl	10.14272/SPSSDDOTEZKOOV-UHFFFAOYSA-N.2	https://dx.doi.org/10.14272/SPSSDDOTEZKOOV-UHFFFAOYSA-N.2
11a	LSH-R171-A	X13035	c1ccc2c(c1)n1nnnc1cn2	10.14272/LGMVEBQKPYIMMI-UHFFFAOYSA-N.2	https://dx.doi.org/10.14272/LGMVEBQKPYIMMI-UHFFFAOYSA-N.2
11a	CML-R57-B	X13035	c1ccc2c(c1)n1nnnc1cn2	10.14272/LGMVEBQKPYIMMI-UHFFFAOYSA-N.3	https://dx.doi.org/10.14272/LGMVEBQKPYIMMI-UHFFFAOYSA-N.3
11b	LSH-R62-A	X16173	Cc1nc2ccccc2n2c1nnn2	10.14272/BVEPTXWZDNARLY-UHFFFAOYSA-N.1	https://dx.doi.org/10.14272/BVEPTXWZDNARLY-UHFFFAOYSA-N.1
11c	LSH-R330-A	X17793	CC(c1nc2ccccc2n2c1nnn2)C	10.14272/UEHBPGWWVJRPTJ-UHFFFAOYSA-N.1	https://dx.doi.org/10.14272/UEHBPGWWVJRPTJ-UHFFFAOYSA-N.1
11d	LSH-R97-A	X13183	FC(c1nc2ccccc2n2c1nnn2)(F)F	10.14272/ALUDOBBDYFOFJP-UHFFFAOYSA-N.1	https://dx.doi.org/10.14272/ALUDOBBDYFOFJP-UHFFFAOYSA-N.1
11e	LSH-R393-A	X18910	c1ccc(cc1)c1nc2ccccc2n2c1nnn2	10.14272/AOUCPYFCRAWRNU-UHFFFAOYSA-N.1	https://dx.doi.org/10.14272/AOUCPYFCRAWRNU-UHFFFAOYSA-N.1
11f	LSH-R112-A	X15664	Clc1nc2ccccc2n2c1nnn2	10.14272/KOWYBYDSUFDMGG-UHFFFAOYSA-N.1	https://dx.doi.org/10.14272/KOWYBYDSUFDMGG-UHFFFAOYSA-N.1
11g	LSH-R322-A	X17797	COc1nc2ccccc2n2c1nnn2	10.14272/VEKBUDDBMJNFNK-UHFFFAOYSA-N.1	https://dx.doi.org/10.14272/VEKBUDDBMJNFNK-UHFFFAOYSA-N.1
11h	LSH-R359-A	X17412	O=c1[nH]c2ccccc2n2c1nnn2	10.14272/SECOVEPJEIBBPV-UHFFFAOYSA-N.1	https://dx.doi.org/10.14272/SECOVEPJEIBBPV-UHFFFAOYSA-N.1
11h	LSH-R322-B	X17796	O=c1[nH]c2ccccc2n2c1nnn2	10.14272/SECOVEPJEIBBPV-UHFFFAOYSA-N.2	https://dx.doi.org/10.14272/SECOVEPJEIBBPV-UHFFFAOYSA-N.2
11i	LSH-R335-A	X17794	CN(c1nc2ccccc2n2c1nnn2)C	10.14272/MKRBRLWZSNAOKA-UHFFFAOYSA-N.1	https://dx.doi.org/10.14272/MKRBRLWZSNAOKA-UHFFFAOYSA-N.1
11j	LSH-R168-A	X15715	CC(=O)c1ccc(cc1)Nc1nc2ccccc2n2c1nnn2	10.14272/OIHNAVUWMWBKPA-UHFFFAOYSA-N.1	https://dx.doi.org/10.14272/OIHNAVUWMWBKPA-UHFFFAOYSA-N.1
11k	JPK-R523-A	X16178	FC(C(C(C(C(C(C(C(F)(F)F)(F)F)(F)F)(F)F)(F)F)(F)F)(F)F)(CCOc1nc2ccccc2n2c1nnn2)F	10.14272/GAIYTCZAQRWQIX-UHFFFAOYSA-N.1	https://dx.doi.org/10.14272/GAIYTCZAQRWQIX-UHFFFAOYSA-N.1
11l	LSH-R337-A	X12540	C[Si](C#Cc1nc2ccccc2n2c1nnn2)(C)C	10.14272/RRWJGDBWTOAAFG-UHFFFAOYSA-N.1	https://dx.doi.org/10.14272/RRWJGDBWTOAAFG-UHFFFAOYSA-N.1
14a	LSH-R186-A	X15736	c1ccc(cc1)c1nnn(c1)c1cnc2c(n1)cccc2	10.14272/QYOUUXWQIVRDNZ-UHFFFAOYSA-N.1	https://dx.doi.org/10.14272/QYOUUXWQIVRDNZ-UHFFFAOYSA-N.1
14b	CML-R20-A	X17106	COc1ccc(cc1)c1nnn(c1)c1cnc2c(n1)cccc2	10.14272/SJCZTVUAGLTCCV-UHFFFAOYSA-N.2	https://dx.doi.org/10.14272/SJCZTVUAGLTCCV-UHFFFAOYSA-N.2
14c	CML-R26-A	X17126	[NH3+]c1ccc(cc1)c1nnn(c1)c1cnc2c(n1)cccc2.[Cl-]	10.14272/GRLFMIQVCULKIR-UHFFFAOYSA-N.1	https://dx.doi.org/10.14272/GRLFMIQVCULKIR-UHFFFAOYSA-N.1
14d	CML-R39-A	X17469	CN(c1ccc(cc1)c1nnn(c1)c1cnc2c(n1)cccc2)C	10.14272/TXQZSMLFWOHBGX-UHFFFAOYSA-N.1	https://dx.doi.org/10.14272/TXQZSMLFWOHBGX-UHFFFAOYSA-N.1
14e	CML-R27-A	X17130	COC(=O)c1ccc(cc1)c1nnn(c1)c1cnc2c(n1)cccc2	10.14272/FEZUXVAXRREZEP-UHFFFAOYSA-N.2	https://dx.doi.org/10.14272/FEZUXVAXRREZEP-UHFFFAOYSA-N.2
14f	LSH-R422-A	X19130	C#Cc1ccc(cc1)c1nnn(c1)c1cnc2c(n1)cccc2	10.14272/UFXVPOPCEVYKQB-UHFFFAOYSA-N.1	https://dx.doi.org/10.14272/UFXVPOPCEVYKQB-UHFFFAOYSA-N.1
14g	CML-R33-A	X17140	COc1cccc(c1)c1nnn(c1)c1cnc2c(n1)cccc2	10.14272/MXGSQRZNSJHGEP-UHFFFAOYSA-N.1	https://dx.doi.org/10.14272/MXGSQRZNSJHGEP-UHFFFAOYSA-N.1
14h	CML-R38-A	X17492	[NH3+]c1cccc(c1)c1nnn(c1)c1cnc2c(n1)cccc2.[Cl-]	10.14272/KUVSJEDELBLMHP-UHFFFAOYSA-N.1	https://dx.doi.org/10.14272/KUVSJEDELBLMHP-UHFFFAOYSA-N.1
14i	CML-R32-A	X17475	O=C1N(Cc2nnn(c2)c2cnc3c(n2)cccc3)C(=O)c2c1cccc2	10.14272/GCJKJVPZVSPCQI-UHFFFAOYSA-N.1	https://dx.doi.org/10.14272/GCJKJVPZVSPCQI-UHFFFAOYSA-N.1
14j	LSH-R281-A	X17108	Cc1ccc(cc1)S(=O)(=O)OCCc1nnn(c1)c1cnc2c(n1)cccc2	10.14272/UTQXOLZOCMOFPG-UHFFFAOYSA-N.1	https://dx.doi.org/10.14272/UTQXOLZOCMOFPG-UHFFFAOYSA-N.1
14j*	LSH-R283-A	X17116	CCN(CCc1nnn(c1)c1cnc2c(n1)cccc2)CC	10.14272/CGUDGUUWCJKDIE-UHFFFAOYSA-N.1	https://dx.doi.org/10.14272/CGUDGUUWCJKDIE-UHFFFAOYSA-N.1
14k	LSH-R221-A	X16173	CCCCc1nnn(c1)c1cnc2c(n1)cccc2	10.14272/AHSWENVYXHLEHF-UHFFFAOYSA-N.1	https://dx.doi.org/10.14272/AHSWENVYXHLEHF-UHFFFAOYSA-N.1
14l	CML-R17-A	X17109	CC(=O)OCc1nnn(c1)c1cnc2c(n1)cccc2	10.14272/DGJCBVVQEVQILV-UHFFFAOYSA-N.1	https://dx.doi.org/10.14272/DGJCBVVQEVQILV-UHFFFAOYSA-N.1
14m	CML-R40-A	X17477	C=CC(=O)OCc1nnn(c1)c1cnc2c(n1)cccc2	10.14272/XJHPHMLSCVFADT-UHFFFAOYSA-N.1	https://dx.doi.org/10.14272/XJHPHMLSCVFADT-UHFFFAOYSA-N.1
14n	CML-R34-A	X17135	C#CCN(Cc1nnn(c1)c1cnc2c(n1)cccc2)CC#C	10.14272/FDGHOWIPSINAHA-UHFFFAOYSA-N.1	https://dx.doi.org/10.14272/FDGHOWIPSINAHA-UHFFFAOYSA-N.1
14o	CML-R81-A	X16895	OCc1nnn(c1)c1cnc2c(n1)cccc2	10.14272/YEBFONFGCJEMAG-UHFFFAOYSA-N.1	https://dx.doi.org/10.14272/YEBFONFGCJEMAG-UHFFFAOYSA-N.1
15a	CML-R58-A	X17470	CCCCc1nnn(c1)c1nc2ccccc2nc1C	10.14272/MGHMBCSNZLEULM-UHFFFAOYSA-N.1	https://dx.doi.org/10.14272/MGHMBCSNZLEULM-UHFFFAOYSA-N.1
15b	LSH-R443-A	X19162	CCCCc1nnn(c1)c1nc2ccccc2nc1C(C)C	10.14272/YKTZEDKRYOIMNU-UHFFFAOYSA-N.1	https://dx.doi.org/10.14272/YKTZEDKRYOIMNU-UHFFFAOYSA-N.1
15d	CML-R74-A	X17765	CCCCc1nnn(c1)c1nc2ccccc2nc1c1ccccc1	10.14272/XJGYBMKEUQIRGA-UHFFFAOYSA-N.1	https://dx.doi.org/10.14272/XJGYBMKEUQIRGA-UHFFFAOYSA-N.1
15f	CML-R82-A	X17776	CCCCc1nnn(c1)c1nc2ccccc2nc1OC	10.14272/LDJGUGHGVWKPPC-UHFFFAOYSA-N.2	https://dx.doi.org/10.14272/LDJGUGHGVWKPPC-UHFFFAOYSA-N.2
15g	LSH-R340-A	X18632	CCCCc1nnn(c1)c1nc2ccccc2nc1Nc1ccc(cc1)C(=O)C	10.14272/WGMOCILRUYTMIW-UHFFFAOYSA-N.1	https://dx.doi.org/10.14272/WGMOCILRUYTMIW-UHFFFAOYSA-N.1
15h	LSH-R435-A	X17779	CCCCc1nnn(c1)c1nc2ccccc2nc1OCCC(C(C(C(C(C(C(C(F)(F)F)(F)F)(F)F)(F)F)(F)F)(F)F)(F)F)(F)F	10.14272/HZQOUMBELHPHLV-UHFFFAOYSA-N.1	https://dx.doi.org/10.14272/HZQOUMBELHPHLV-UHFFFAOYSA-N.1
16b	LSH-R443-B	X18637	CCCCc1cnc2n1c1ccccc1nc2C(C)C	10.14272/AFQHYVRVQPQNNN-UHFFFAOYSA-N.1	https://dx.doi.org/10.14272/AFQHYVRVQPQNNN-UHFFFAOYSA-N.1
16c	LSH-R377-A	X16172	CCCCc1cnc2n1c1ccccc1nc2C(F)(F)F	10.14272/YXIJMMYJFBYEEB-UHFFFAOYSA-N.1	https://dx.doi.org/10.14272/YXIJMMYJFBYEEB-UHFFFAOYSA-N.1
16e	LSH-R464-B	X19758	CCCCc1cnc2n1c1ccccc1nc2Cl	10.14272/CWXIXBIIISVJRL-UHFFFAOYSA-N.1	https://dx.doi.org/10.14272/CWXIXBIIISVJRL-UHFFFAOYSA-N.1
16h	LSH-R435-C	X18959	CCCCc1cnc2n1c1ccccc1nc2OCCC(C(C(C(C(C(C(C(F)(F)F)(F)F)(F)F)(F)F)(F)F)(F)F)(F)F)(F)F	10.14272/ICMDLGQTBHAPKS-UHFFFAOYSA-N.1	https://dx.doi.org/10.14272/ICMDLGQTBHAPKS-UHFFFAOYSA-N.1
17a	LSH-R448-B	X17463	Cc1nc2ccccc2nc1N	10.14272/WGHZDFAULZNZJE-UHFFFAOYSA-N.2	https://dx.doi.org/10.14272/WGHZDFAULZNZJE-UHFFFAOYSA-N.2
17b	LSH-R443-D	X19706	CC(c1nc2ccccc2nc1N)C	10.14272/IRSRPTQGLZTLGL-UHFFFAOYSA-N.1	https://dx.doi.org/10.14272/IRSRPTQGLZTLGL-UHFFFAOYSA-N.1
17c	LSH-R377-B	X16172	Nc1nc2ccccc2nc1C(F)(F)F	10.14272/STMGCUUVVSSYBM-UHFFFAOYSA-N.1	https://dx.doi.org/10.14272/STMGCUUVVSSYBM-UHFFFAOYSA-N.1
17d	CML-R74-B	X17764	Nc1nc2ccccc2nc1c1ccccc1	10.14272/ABTZHDQWMUXIFW-UHFFFAOYSA-N.4	https://dx.doi.org/10.14272/ABTZHDQWMUXIFW-UHFFFAOYSA-N.4
17e	LSH-R464-C	X14000	Nc1nc2ccccc2nc1Cl	10.14272/NOFJFBHOKPHILH-UHFFFAOYSA-N.3	https://dx.doi.org/10.14272/NOFJFBHOKPHILH-UHFFFAOYSA-N.3
17g	LSH-R340-B	X18663	Nc1nc2ccccc2nc1Nc1ccc(cc1)C(=O)C	10.14272/BLJPCFCXXBZYPN-UHFFFAOYSA-N.1	https://dx.doi.org/10.14272/BLJPCFCXXBZYPN-UHFFFAOYSA-N.1
17h	LSH-R435-B	X18946	Nc1nc2ccccc2nc1OCCC(C(C(C(C(C(C(C(F)(F)F)(F)F)(F)F)(F)F)(F)F)(F)F)(F)F)(F)F	10.14272/VVNPRYRWMNIXCI-UHFFFAOYSA-N.1	https://dx.doi.org/10.14272/VVNPRYRWMNIXCI-UHFFFAOYSA-N.1
25a	LSH-R364-A	X17789	c1ccc(cc1)c1nnn(c1)c1nc2ccccc2n2c1ncc2c1ccccc1	10.14272/DHVXGDPBGBTTOC-UHFFFAOYSA-N.1	https://dx.doi.org/10.14272/DHVXGDPBGBTTOC-UHFFFAOYSA-N.1
25b	LSH-R373-A	X18655	CCCCc1nnn(c1)c1nc2ccccc2n2c1ncc2CCCC	10.14272/OGPHMCIIGIGFPL-UHFFFAOYSA-N.1	https://dx.doi.org/10.14272/OGPHMCIIGIGFPL-UHFFFAOYSA-N.1
27a	CML-R36-A	X17185	[O]#C[Re](C#[O])(C#[O])Br.CCCCc1nnn(c1)c1cnc2c(n1)cccc2	10.14272/CCAUEKYEPREEHO-UHFFFAOYSA-M.2	https://dx.doi.org/10.14272/CCAUEKYEPREEHO-UHFFFAOYSA-M.2
27b	LSH-R470-A	X19165	c1ccc(cc1)c1nnn(c1)c1cnc2c(n1)cccc2.[C-]#[O+].[C-]#[O+].[C-]#[O+].Br[Re]	10.14272/JFQQXHCZLVWKOL-UHFFFAOYSA-M.1	https://dx.doi.org/10.14272/JFQQXHCZLVWKOL-UHFFFAOYSA-M.1
27c	LSH-R474-A	X19761	CCCCc1nnn(c1)c1nc2ccccc2nc1C.[C-]#[O+].[C-]#[O+].[C-]#[O+].Br[Re]	10.14272/DDQBGZVUDRTHAU-UHFFFAOYSA-M.1	https://dx.doi.org/10.14272/DDQBGZVUDRTHAU-UHFFFAOYSA-M.1
27d	LSH-R484-A	X20024	CCCCc1nnn(c1)c1nc2ccccc2nc1c1ccccc1.[C-]#[O+].[C-]#[O+].[C-]#[O+].Br[Re]	10.14272/BKFBOTQHKAJKOY-UHFFFAOYSA-M.1	https://dx.doi.org/10.14272/BKFBOTQHKAJKOY-UHFFFAOYSA-M.1
4j	LSH-R280-A	X17196	C#CCCOS(=O)(=O)c1ccc(cc1)C	10.14272/STOASOOVVADOKH-UHFFFAOYSA-N.1	https://dx.doi.org/10.14272/STOASOOVVADOKH-UHFFFAOYSA-N.1
4p	CML-R41-A	X17141	C#Cc1ccc(cc1)C(=O)O	10.14272/SJXHLZCPDZPBPW-UHFFFAOYSA-N.1	https://dx.doi.org/10.14272/SJXHLZCPDZPBPW-UHFFFAOYSA-N.1
S1	LSH-R41-A	X12540	O=c1[nH]c2ccccc2[nH]c1=O	10.14272/ABJFBJGGLJVMAQ-UHFFFAOYSA-N.1	https://dx.doi.org/10.14272/ABJFBJGGLJVMAQ-UHFFFAOYSA-N.1
S2a	LSH-R203-A	X16022	O=c1cnc2c([nH]1)cccc2	10.14272/FFRYUAVNPBUEIC-UHFFFAOYSA-N.2	https://dx.doi.org/10.14272/FFRYUAVNPBUEIC-UHFFFAOYSA-N.2
S2b	LSH-R53-A	X12522	O=c1[nH]c2ccccc2nc1C	10.14272/BMIMNRPAEPIYDN-UHFFFAOYSA-N.4	https://dx.doi.org/10.14272/BMIMNRPAEPIYDN-UHFFFAOYSA-N.4
S2c	LSH-R261-A	X16393	CC(c1nc2ccccc2[nH]c1=O)C	10.14272/CWFPSKVBKAPBPV-UHFFFAOYSA-N.1	https://dx.doi.org/10.14272/CWFPSKVBKAPBPV-UHFFFAOYSA-N.1
S2d	LSH-R120-A	X13040	O=c1[nH]c2ccccc2nc1C(F)(F)F	10.14272/NOGLKXWLUDJZDQ-UHFFFAOYSA-N.1	https://dx.doi.org/10.14272/NOGLKXWLUDJZDQ-UHFFFAOYSA-N.1
S2e	JPK-R5-A	X11154	O=c1[nH]c2ccccc2nc1c1ccccc1	10.14272/ZBBQSGVRBQKLLE-UHFFFAOYSA-N.1	https://dx.doi.org/10.14272/ZBBQSGVRBQKLLE-UHFFFAOYSA-N.1
S3	LSH-R462-A	X17118	c1ccc2c(-n3nnnc3CN2)c1	10.14272/JJCQHCJBVSOFTM-UHFFFAOYSA-N.1	https://dx.doi.org/10.14272/JJCQHCJBVSOFTM-UHFFFAOYSA-N.1
S4	LSH-R290-A	X17127	CN1Cc2nnnn2-c2c1cccc2	10.14272/VJXDMNNLLZYTRN-UHFFFAOYSA-N.1	https://dx.doi.org/10.14272/VJXDMNNLLZYTRN-UHFFFAOYSA-N.1
S5a	LSH-R364-B	X18654	Nc1nc2ccccc2n2c1ncc2c1ccccc1	10.14272/LDKDBUVLGOHXSC-UHFFFAOYSA-N.1	https://dx.doi.org/10.14272/LDKDBUVLGOHXSC-UHFFFAOYSA-N.1
S5b	LSH-R373-E	X18664	CCCCc1nnn(c1)c1nc2ccccc2nc1N	10.14272/HPWSELBHSNTVDQ-UHFFFAOYSA-N.1	https://dx.doi.org/10.14272/HPWSELBHSNTVDQ-UHFFFAOYSA-N.1
S5b	LSH-R373-B	X19128	CCCCc1cnc2n1c1ccccc1nc2N	10.14272/IMOCGYGQTYCGDY-UHFFFAOYSA-N.1	https://dx.doi.org/10.14272/IMOCGYGQTYCGDY-UHFFFAOYSA-N.1
S6a	LSH-R364-C	X18693	Nc1nc2ccccc2nc1n1nnc(c1)c1ccccc1	10.14272/XAKPOUMBAWIAJL-UHFFFAOYSA-N.1	https://dx.doi.org/10.14272/XAKPOUMBAWIAJL-UHFFFAOYSA-N.1
S7b	LSH-R373-C	X18661	CCCCc1nnn(c1)c1nc2ccccc2nc1n1nnc(c1)CCCC	10.14272/BZUADUCGXDAGNQ-UHFFFAOYSA-N.1	https://dx.doi.org/10.14272/BZUADUCGXDAGNQ-UHFFFAOYSA-N.1

## Sheet: samples_structures
Manuscript number	sample name	sample external label	canonical smiles	doi	url
11h	LSH-R359-A	X17412	O=c1[nH]c2ccccc2n2c1nnn2	10.14272/SECOVEPJEIBBPV-UHFFFAOYSA-N.1	https://dx.doi.org/10.14272/SECOVEPJEIBBPV-UHFFFAOYSA-N.1
11h	LSH-R322-B	X17796	O=c1[nH]c2ccccc2n2c1nnn2	10.14272/SECOVEPJEIBBPV-UHFFFAOYSA-N.2	https://dx.doi.org/10.14272/SECOVEPJEIBBPV-UHFFFAOYSA-N.2
11g	LSH-R322-A	X17797	COc1nc2ccccc2n2c1nnn2	10.14272/VEKBUDDBMJNFNK-UHFFFAOYSA-N.1	https://dx.doi.org/10.14272/VEKBUDDBMJNFNK-UHFFFAOYSA-N.1
14f	LSH-R422-A	X19130	C#Cc1ccc(cc1)c1nnn(c1)c1cnc2c(n1)cccc2	10.14272/UFXVPOPCEVYKQB-UHFFFAOYSA-N.1	https://dx.doi.org/10.14272/UFXVPOPCEVYKQB-UHFFFAOYSA-N.1
S5b	LSH-R373-E	X18664	CCCCc1nnn(c1)c1nc2ccccc2nc1N	10.14272/HPWSELBHSNTVDQ-UHFFFAOYSA-N.1	https://dx.doi.org/10.14272/HPWSELBHSNTVDQ-UHFFFAOYSA-N.1
S7b	LSH-R373-C	X18661	CCCCc1nnn(c1)c1nc2ccccc2nc1n1nnc(c1)CCCC	10.14272/BZUADUCGXDAGNQ-UHFFFAOYSA-N.1	https://dx.doi.org/10.14272/BZUADUCGXDAGNQ-UHFFFAOYSA-N.1
S5b	LSH-R373-B	X19128	CCCCc1cnc2n1c1ccccc1nc2N	10.14272/IMOCGYGQTYCGDY-UHFFFAOYSA-N.1	https://dx.doi.org/10.14272/IMOCGYGQTYCGDY-UHFFFAOYSA-N.1
25a	LSH-R373-A	X18655	CCCCc1nnn(c1)c1nc2ccccc2n2c1ncc2CCCC	10.14272/OGPHMCIIGIGFPL-UHFFFAOYSA-N.1	https://dx.doi.org/10.14272/OGPHMCIIGIGFPL-UHFFFAOYSA-N.1
11i	LSH-R335-A	X17794	CN(c1nc2ccccc2n2c1nnn2)C	10.14272/MKRBRLWZSNAOKA-UHFFFAOYSA-N.1	https://dx.doi.org/10.14272/MKRBRLWZSNAOKA-UHFFFAOYSA-N.1
11j	LSH-R168-A	X15715	CC(=O)c1ccc(cc1)Nc1nc2ccccc2n2c1nnn2	10.14272/OIHNAVUWMWBKPA-UHFFFAOYSA-N.1	https://dx.doi.org/10.14272/OIHNAVUWMWBKPA-UHFFFAOYSA-N.1
S4	LSH-R290-A	X17127	CN1Cc2nnnn2-c2c1cccc2	10.14272/VJXDMNNLLZYTRN-UHFFFAOYSA-N.1	https://dx.doi.org/10.14272/VJXDMNNLLZYTRN-UHFFFAOYSA-N.1
S3	LSH-R462-A	X17118	c1ccc2c(-n3nnnc3CN2)c1	10.14272/JJCQHCJBVSOFTM-UHFFFAOYSA-N.1	https://dx.doi.org/10.14272/JJCQHCJBVSOFTM-UHFFFAOYSA-N.1
14j*	LSH-R283-A	X17116	CCN(CCc1nnn(c1)c1cnc2c(n1)cccc2)CC	10.14272/CGUDGUUWCJKDIE-UHFFFAOYSA-N.1	https://dx.doi.org/10.14272/CGUDGUUWCJKDIE-UHFFFAOYSA-N.1
14j	LSH-R281-A	X17108	Cc1ccc(cc1)S(=O)(=O)OCCc1nnn(c1)c1cnc2c(n1)cccc2	10.14272/UTQXOLZOCMOFPG-UHFFFAOYSA-N.1	https://dx.doi.org/10.14272/UTQXOLZOCMOFPG-UHFFFAOYSA-N.1
29	LSH-R437-A	X19190	CCN(CCc1nnn(c1)c1cnc2c(n1)cccc2)CC.[C-]#[O+].[C-]#[O+].[C-]#[O+].Br[Re]	10.14272/LHPVGPJSNAKQBR-UHFFFAOYSA-M.1	https://dx.doi.org/10.14272/LHPVGPJSNAKQBR-UHFFFAOYSA-M.1
17g	LSH-R340-B	X18663	Nc1nc2ccccc2nc1Nc1ccc(cc1)C(=O)C	10.14272/BLJPCFCXXBZYPN-UHFFFAOYSA-N.1	https://dx.doi.org/10.14272/BLJPCFCXXBZYPN-UHFFFAOYSA-N.1
15g	LSH-R340-A	X18632	CCCCc1nnn(c1)c1nc2ccccc2nc1Nc1ccc(cc1)C(=O)C	10.14272/WGMOCILRUYTMIW-UHFFFAOYSA-N.1	https://dx.doi.org/10.14272/WGMOCILRUYTMIW-UHFFFAOYSA-N.1
27b	LSH-R470-A	X19165	c1ccc(cc1)c1nnn(c1)c1cnc2c(n1)cccc2.[C-]#[O+].[C-]#[O+].[C-]#[O+].Br[Re]	10.14272/JFQQXHCZLVWKOL-UHFFFAOYSA-M.1	https://dx.doi.org/10.14272/JFQQXHCZLVWKOL-UHFFFAOYSA-M.1
14a	LSH-R186-A	X15736	c1ccc(cc1)c1nnn(c1)c1cnc2c(n1)cccc2	10.14272/QYOUUXWQIVRDNZ-UHFFFAOYSA-N.1	https://dx.doi.org/10.14272/QYOUUXWQIVRDNZ-UHFFFAOYSA-N.1
11e	LSH-R393-A	X18910	c1ccc(cc1)c1nc2ccccc2n2c1nnn2	10.14272/AOUCPYFCRAWRNU-UHFFFAOYSA-N.1	https://dx.doi.org/10.14272/AOUCPYFCRAWRNU-UHFFFAOYSA-N.1
16h	LSH-R435-C	X18959	CCCCc1cnc2n1c1ccccc1nc2OCCC(C(C(C(C(C(C(C(F)(F)F)(F)F)(F)F)(F)F)(F)F)(F)F)(F)F)(F)F	10.14272/ICMDLGQTBHAPKS-UHFFFAOYSA-N.1	https://dx.doi.org/10.14272/ICMDLGQTBHAPKS-UHFFFAOYSA-N.1
15h	LSH-R435-A	X17779	CCCCc1nnn(c1)c1nc2ccccc2nc1OCCC(C(C(C(C(C(C(C(F)(F)F)(F)F)(F)F)(F)F)(F)F)(F)F)(F)F)(F)F	10.14272/HZQOUMBELHPHLV-UHFFFAOYSA-N.1	https://dx.doi.org/10.14272/HZQOUMBELHPHLV-UHFFFAOYSA-N.1
17h	LSH-R435-B	X18946	Nc1nc2ccccc2nc1OCCC(C(C(C(C(C(C(C(F)(F)F)(F)F)(F)F)(F)F)(F)F)(F)F)(F)F)(F)F	10.14272/VVNPRYRWMNIXCI-UHFFFAOYSA-N.1	https://dx.doi.org/10.14272/VVNPRYRWMNIXCI-UHFFFAOYSA-N.1
4j	LSH-R280-A	X17196	C#CCCOS(=O)(=O)c1ccc(cc1)C	10.14272/STOASOOVVADOKH-UHFFFAOYSA-N.1	https://dx.doi.org/10.14272/STOASOOVVADOKH-UHFFFAOYSA-N.1
14k	LSH-R221-A	X16173	CCCCc1nnn(c1)c1cnc2c(n1)cccc2	10.14272/AHSWENVYXHLEHF-UHFFFAOYSA-N.1	https://dx.doi.org/10.14272/AHSWENVYXHLEHF-UHFFFAOYSA-N.1
11b	LSH-R62-A	X16173	Cc1nc2ccccc2n2c1nnn2	10.14272/BVEPTXWZDNARLY-UHFFFAOYSA-N.1	https://dx.doi.org/10.14272/BVEPTXWZDNARLY-UHFFFAOYSA-N.1
S2d	LSH-R120-A	X13040	O=c1[nH]c2ccccc2nc1C(F)(F)F	10.14272/NOGLKXWLUDJZDQ-UHFFFAOYSA-N.1	https://dx.doi.org/10.14272/NOGLKXWLUDJZDQ-UHFFFAOYSA-N.1
11d	LSH-R97-A	X13183	FC(c1nc2ccccc2n2c1nnn2)(F)F	10.14272/ALUDOBBDYFOFJP-UHFFFAOYSA-N.1	https://dx.doi.org/10.14272/ALUDOBBDYFOFJP-UHFFFAOYSA-N.1
11a	LSH-R171-A	X13035	c1ccc2c(c1)n1nnnc1cn2	10.14272/LGMVEBQKPYIMMI-UHFFFAOYSA-N.2	https://dx.doi.org/10.14272/LGMVEBQKPYIMMI-UHFFFAOYSA-N.2
24	LSH-R47-A	X12439	c1ccc2c(c1)n1nnnc1c1n2nnn1	10.14272/CXZSDEGQLBZWEC-UHFFFAOYSA-N.1	https://dx.doi.org/10.14272/CXZSDEGQLBZWEC-UHFFFAOYSA-N.1
S1	LSH-R41-A	X12540	O=c1[nH]c2ccccc2[nH]c1=O	10.14272/ABJFBJGGLJVMAQ-UHFFFAOYSA-N.1	https://dx.doi.org/10.14272/ABJFBJGGLJVMAQ-UHFFFAOYSA-N.1
11c	LSH-R330-A	X17793	CC(c1nc2ccccc2n2c1nnn2)C	10.14272/UEHBPGWWVJRPTJ-UHFFFAOYSA-N.1	https://dx.doi.org/10.14272/UEHBPGWWVJRPTJ-UHFFFAOYSA-N.1
10c	LSH-R326-A	X17790	CC(c1nc2ccccc2nc1Cl)C	10.14272/ZRDHYUMEEXJHJN-UHFFFAOYSA-N.1	https://dx.doi.org/10.14272/ZRDHYUMEEXJHJN-UHFFFAOYSA-N.1
S2c	LSH-R261-A	X16393	CC(c1nc2ccccc2[nH]c1=O)C	10.14272/CWFPSKVBKAPBPV-UHFFFAOYSA-N.1	https://dx.doi.org/10.14272/CWFPSKVBKAPBPV-UHFFFAOYSA-N.1
12	LSH-R156-A	X15500	NNc1nc2ccccc2nc1Cl	10.14272/RODNZCIFRICALV-UHFFFAOYSA-N.2	https://dx.doi.org/10.14272/RODNZCIFRICALV-UHFFFAOYSA-N.2
11l	LSH-R337-A	X12540	C[Si](C#Cc1nc2ccccc2n2c1nnn2)(C)C	10.14272/RRWJGDBWTOAAFG-UHFFFAOYSA-N.1	https://dx.doi.org/10.14272/RRWJGDBWTOAAFG-UHFFFAOYSA-N.1
10d	LSH-R94-A	X13151	Clc1nc2ccccc2nc1C(F)(F)F	10.14272/DSMMAQWRRJQVTQ-UHFFFAOYSA-N.1	https://dx.doi.org/10.14272/DSMMAQWRRJQVTQ-UHFFFAOYSA-N.1
17b	LSH-R443-D	X19706	CC(c1nc2ccccc2nc1N)C	10.14272/IRSRPTQGLZTLGL-UHFFFAOYSA-N.1	https://dx.doi.org/10.14272/IRSRPTQGLZTLGL-UHFFFAOYSA-N.1
16b	LSH-R443-B	X18637	CCCCc1cnc2n1c1ccccc1nc2C(C)C	10.14272/AFQHYVRVQPQNNN-UHFFFAOYSA-N.1	https://dx.doi.org/10.14272/AFQHYVRVQPQNNN-UHFFFAOYSA-N.1
15b	LSH-R443-A	X19162	CCCCc1nnn(c1)c1nc2ccccc2nc1C(C)C	10.14272/YKTZEDKRYOIMNU-UHFFFAOYSA-N.1	https://dx.doi.org/10.14272/YKTZEDKRYOIMNU-UHFFFAOYSA-N.1
30	LSH-R444-A	X19160	CCCCc1nnn(c1)c1nc2ccccc2n2c1ncc2CCCC.[C-]#[O+].[C-]#[O+].[C-]#[O+].Br[Re]	10.14272/IYHBIYUJPQGBCO-UHFFFAOYSA-M.1	https://dx.doi.org/10.14272/IYHBIYUJPQGBCO-UHFFFAOYSA-M.1
17c	LSH-R377-B	X16172	Nc1nc2ccccc2nc1C(F)(F)F	10.14272/STMGCUUVVSSYBM-UHFFFAOYSA-N.1	https://dx.doi.org/10.14272/STMGCUUVVSSYBM-UHFFFAOYSA-N.1
16c	LSH-R377-A	X16172	CCCCc1cnc2n1c1ccccc1nc2C(F)(F)F	10.14272/YXIJMMYJFBYEEB-UHFFFAOYSA-N.1	https://dx.doi.org/10.14272/YXIJMMYJFBYEEB-UHFFFAOYSA-N.1
17a	LSH-R448-B	X17463	Cc1nc2ccccc2nc1N	10.14272/WGHZDFAULZNZJE-UHFFFAOYSA-N.2	https://dx.doi.org/10.14272/WGHZDFAULZNZJE-UHFFFAOYSA-N.2
27c	LSH-R474-A	X19761	CCCCc1nnn(c1)c1nc2ccccc2nc1C.[C-]#[O+].[C-]#[O+].[C-]#[O+].Br[Re]	10.14272/DDQBGZVUDRTHAU-UHFFFAOYSA-M.1	https://dx.doi.org/10.14272/DDQBGZVUDRTHAU-UHFFFAOYSA-M.1
16e	LSH-R464-B	X19758	CCCCc1cnc2n1c1ccccc1nc2Cl	10.14272/CWXIXBIIISVJRL-UHFFFAOYSA-N.1	https://dx.doi.org/10.14272/CWXIXBIIISVJRL-UHFFFAOYSA-N.1
17e	LSH-R464-C	X14000	Nc1nc2ccccc2nc1Cl	10.14272/NOFJFBHOKPHILH-UHFFFAOYSA-N.3	https://dx.doi.org/10.14272/NOFJFBHOKPHILH-UHFFFAOYSA-N.3
S6a	LSH-R364-C	X18693	Nc1nc2ccccc2nc1n1nnc(c1)c1ccccc1	10.14272/XAKPOUMBAWIAJL-UHFFFAOYSA-N.1	https://dx.doi.org/10.14272/XAKPOUMBAWIAJL-UHFFFAOYSA-N.1
25a	LSH-R364-A	X17789	c1ccc(cc1)c1nnn(c1)c1nc2ccccc2n2c1ncc2c1ccccc1	10.14272/DHVXGDPBGBTTOC-UHFFFAOYSA-N.1	https://dx.doi.org/10.14272/DHVXGDPBGBTTOC-UHFFFAOYSA-N.1
S5a	LSH-R364-B	X18654	Nc1nc2ccccc2n2c1ncc2c1ccccc1	10.14272/LDKDBUVLGOHXSC-UHFFFAOYSA-N.1	https://dx.doi.org/10.14272/LDKDBUVLGOHXSC-UHFFFAOYSA-N.1
27d	LSH-R484-A	X20024	CCCCc1nnn(c1)c1nc2ccccc2nc1c1ccccc1.[C-]#[O+].[C-]#[O+].[C-]#[O+].Br[Re]	10.14272/BKFBOTQHKAJKOY-UHFFFAOYSA-M.1	https://dx.doi.org/10.14272/BKFBOTQHKAJKOY-UHFFFAOYSA-M.1
14o	CML-R81-A	X16895	OCc1nnn(c1)c1cnc2c(n1)cccc2	10.14272/YEBFONFGCJEMAG-UHFFFAOYSA-N.1	https://dx.doi.org/10.14272/YEBFONFGCJEMAG-UHFFFAOYSA-N.1
11a	CML-R57-B	X13035	c1ccc2c(c1)n1nnnc1cn2	10.14272/LGMVEBQKPYIMMI-UHFFFAOYSA-N.3	https://dx.doi.org/10.14272/LGMVEBQKPYIMMI-UHFFFAOYSA-N.3
15f	CML-R82-A	X17776	CCCCc1nnn(c1)c1nc2ccccc2nc1OC	10.14272/LDJGUGHGVWKPPC-UHFFFAOYSA-N.2	https://dx.doi.org/10.14272/LDJGUGHGVWKPPC-UHFFFAOYSA-N.2
27a	CML-R36-A	X17185	[O]#C[Re](C#[O])(C#[O])Br.CCCCc1nnn(c1)c1cnc2c(n1)cccc2	10.14272/CCAUEKYEPREEHO-UHFFFAOYSA-M.2	https://dx.doi.org/10.14272/CCAUEKYEPREEHO-UHFFFAOYSA-M.2
14l	CML-R17-A	X17109	CC(=O)OCc1nnn(c1)c1cnc2c(n1)cccc2	10.14272/DGJCBVVQEVQILV-UHFFFAOYSA-N.1	https://dx.doi.org/10.14272/DGJCBVVQEVQILV-UHFFFAOYSA-N.1
14e	CML-R27-A	X17130	COC(=O)c1ccc(cc1)c1nnn(c1)c1cnc2c(n1)cccc2	10.14272/FEZUXVAXRREZEP-UHFFFAOYSA-N.2	https://dx.doi.org/10.14272/FEZUXVAXRREZEP-UHFFFAOYSA-N.2
14n	CML-R34-A	X17135	C#CCN(Cc1nnn(c1)c1cnc2c(n1)cccc2)CC#C	10.14272/FDGHOWIPSINAHA-UHFFFAOYSA-N.1	https://dx.doi.org/10.14272/FDGHOWIPSINAHA-UHFFFAOYSA-N.1
14b	CML-R20-A	X17106	COc1ccc(cc1)c1nnn(c1)c1cnc2c(n1)cccc2	10.14272/SJCZTVUAGLTCCV-UHFFFAOYSA-N.2	https://dx.doi.org/10.14272/SJCZTVUAGLTCCV-UHFFFAOYSA-N.2
14d	CML-R39-A	X17469	CN(c1ccc(cc1)c1nnn(c1)c1cnc2c(n1)cccc2)C	10.14272/TXQZSMLFWOHBGX-UHFFFAOYSA-N.1	https://dx.doi.org/10.14272/TXQZSMLFWOHBGX-UHFFFAOYSA-N.1
14h	CML-R38-A	X17492	[NH3+]c1cccc(c1)c1nnn(c1)c1cnc2c(n1)cccc2.[Cl-]	10.14272/KUVSJEDELBLMHP-UHFFFAOYSA-N.1	https://dx.doi.org/10.14272/KUVSJEDELBLMHP-UHFFFAOYSA-N.1
14g	CML-R33-A	X17140	COc1cccc(c1)c1nnn(c1)c1cnc2c(n1)cccc2	10.14272/MXGSQRZNSJHGEP-UHFFFAOYSA-N.1	https://dx.doi.org/10.14272/MXGSQRZNSJHGEP-UHFFFAOYSA-N.1
14i	CML-R32-A	X17475	O=C1N(Cc2nnn(c2)c2cnc3c(n2)cccc3)C(=O)c2c1cccc2	10.14272/GCJKJVPZVSPCQI-UHFFFAOYSA-N.1	https://dx.doi.org/10.14272/GCJKJVPZVSPCQI-UHFFFAOYSA-N.1
14c	CML-R26-A	X17126	[NH3+]c1ccc(cc1)c1nnn(c1)c1cnc2c(n1)cccc2.[Cl-]	10.14272/GRLFMIQVCULKIR-UHFFFAOYSA-N.1	https://dx.doi.org/10.14272/GRLFMIQVCULKIR-UHFFFAOYSA-N.1
14m	CML-R40-A	X17477	C=CC(=O)OCc1nnn(c1)c1cnc2c(n1)cccc2	10.14272/XJHPHMLSCVFADT-UHFFFAOYSA-N.1	https://dx.doi.org/10.14272/XJHPHMLSCVFADT-UHFFFAOYSA-N.1
15a	CML-R58-A	X17470	CCCCc1nnn(c1)c1nc2ccccc2nc1C	10.14272/MGHMBCSNZLEULM-UHFFFAOYSA-N.1	https://dx.doi.org/10.14272/MGHMBCSNZLEULM-UHFFFAOYSA-N.1
17d	CML-R74-B	X17764	Nc1nc2ccccc2nc1c1ccccc1	10.14272/ABTZHDQWMUXIFW-UHFFFAOYSA-N.4	https://dx.doi.org/10.14272/ABTZHDQWMUXIFW-UHFFFAOYSA-N.4
15d	CML-R74-A	X17765	CCCCc1nnn(c1)c1nc2ccccc2nc1c1ccccc1	10.14272/XJGYBMKEUQIRGA-UHFFFAOYSA-N.1	https://dx.doi.org/10.14272/XJGYBMKEUQIRGA-UHFFFAOYSA-N.1
4p	CML-R41-A	X17141	C#Cc1ccc(cc1)C(=O)O	10.14272/SJXHLZCPDZPBPW-UHFFFAOYSA-N.1	https://dx.doi.org/10.14272/SJXHLZCPDZPBPW-UHFFFAOYSA-N.1
S2a	LSH-R203-A	X16022	O=c1cnc2c([nH]1)cccc2	10.14272/FFRYUAVNPBUEIC-UHFFFAOYSA-N.2	https://dx.doi.org/10.14272/FFRYUAVNPBUEIC-UHFFFAOYSA-N.2
11k	JPK-R523-A	X16178	FC(C(C(C(C(C(C(C(F)(F)F)(F)F)(F)F)(F)F)(F)F)(F)F)(F)F)(CCOc1nc2ccccc2n2c1nnn2)F	10.14272/GAIYTCZAQRWQIX-UHFFFAOYSA-N.1	https://dx.doi.org/10.14272/GAIYTCZAQRWQIX-UHFFFAOYSA-N.1
10b	LSH-R54-A	X12532	Cc1nc2ccccc2nc1Cl	10.14272/PXDLUYLWPJMGJA-UHFFFAOYSA-N.1	https://dx.doi.org/10.14272/PXDLUYLWPJMGJA-UHFFFAOYSA-N.1
10a	LSH-R204-A	X16026	Clc1cnc2c(n1)cccc2	10.14272/BYHVGQHIAFURIL-UHFFFAOYSA-N.2	https://dx.doi.org/10.14272/BYHVGQHIAFURIL-UHFFFAOYSA-N.2
10f	LSH-R44-A	X12521	Clc1nc2ccccc2nc1Cl	10.14272/SPSSDDOTEZKOOV-UHFFFAOYSA-N.2	https://dx.doi.org/10.14272/SPSSDDOTEZKOOV-UHFFFAOYSA-N.2
S2b	LSH-R53-A	X12522	O=c1[nH]c2ccccc2nc1C	10.14272/BMIMNRPAEPIYDN-UHFFFAOYSA-N.4	https://dx.doi.org/10.14272/BMIMNRPAEPIYDN-UHFFFAOYSA-N.4
10e	JPK-R14-A	X11411	Clc1nc2ccccc2nc1c1ccccc1	10.14272/KPGPIQKEKAEAHM-UHFFFAOYSA-N.1	https://dx.doi.org/10.14272/KPGPIQKEKAEAHM-UHFFFAOYSA-N.1
S2e	JPK-R5-A	X11154	O=c1[nH]c2ccccc2nc1c1ccccc1	10.14272/ZBBQSGVRBQKLLE-UHFFFAOYSA-N.1	https://dx.doi.org/10.14272/ZBBQSGVRBQKLLE-UHFFFAOYSA-N.1
11f	LSH-R112-A	X15664	Clc1nc2ccccc2n2c1nnn2	10.14272/KOWYBYDSUFDMGG-UHFFFAOYSA-N.1	https://dx.doi.org/10.14272/KOWYBYDSUFDMGG-UHFFFAOYSA-N.1

## Sheet: sample_analyses
sample name	sample external label	doi	name	uuid	kind
LSH-R359-A	X17412
	X17412	10.14272/SECOVEPJEIBBPV-UHFFFAOYSA-N/CHMO0000593	LSH-R359A_1H	b76d7498-40f4-4beb-90ca-50f62c45b5ef	CHMO:0000593 | 1H nuclear magnetic resonance spectroscopy (1H NMR)
	X17412	10.14272/SECOVEPJEIBBPV-UHFFFAOYSA-N/CHMO0000595	LSH-R359A_13C	4f8d2e0e-a873-40b1-9aaa-57f38b3477ae	CHMO:0000595 | 13C nuclear magnetic resonance spectroscopy (13C NMR)
	X17412	10.14272/SECOVEPJEIBBPV-UHFFFAOYSA-N/CHMO0001146	LSH-R359A_HSQC	6a8aa958-553e-4552-a5ff-4330e33c9e71	CHMO:0001146 | 1H--13C heteronuclear single quantum coherence (1H-13C HSQC)
	X17412	10.14272/SECOVEPJEIBBPV-UHFFFAOYSA-N/CHMO0000470	LSH-R359A_MS	913302c7-4e7d-4abc-bff5-5408b462c386	CHMO:0000470 | mass spectrometry (MS)
	X17412	10.14272/SECOVEPJEIBBPV-UHFFFAOYSA-N/CHMO0000630	LSH-R359A_IR	aca12df9-0b4c-431d-bd59-385f9daff887	CHMO:0000630 | infrared absorption spectroscopy (IR)
LSH-R322-B	X17796
	X17796	10.14272/SECOVEPJEIBBPV-UHFFFAOYSA-N/CHMO0000593.1	LSH-R322B_1H	e8dff74f-bb13-4381-88fe-7ea6cedd8ec5	CHMO:0000593 | 1H nuclear magnetic resonance spectroscopy (1H NMR)
LSH-R322-A	X17797
	X17797	10.14272/VEKBUDDBMJNFNK-UHFFFAOYSA-N/CHMO0000593	LSH-R322A_1H	340b4792-02ad-4fd7-b275-83fd83102a50	CHMO:0000593 | 1H nuclear magnetic resonance spectroscopy (1H NMR)
	X17797	10.14272/VEKBUDDBMJNFNK-UHFFFAOYSA-N/CHMO0000595	LSH-R322A_13C	20d003f8-a5d0-44c4-ab74-a6342f20097b	CHMO:0000595 | 13C nuclear magnetic resonance spectroscopy (13C NMR)
	X17797	10.14272/VEKBUDDBMJNFNK-UHFFFAOYSA-N/CHMO0001146	LSH-R322A_HSQC	379021e8-7c75-436d-a9a1-5d015845f597	CHMO:0001146 | 1H--13C heteronuclear single quantum coherence (1H-13C HSQC)
	X17797	10.14272/VEKBUDDBMJNFNK-UHFFFAOYSA-N/CHMO0000470	LSH-R322A_MS	8e4477d3-8e37-4899-9032-10e81f7b2122	CHMO:0000470 | mass spectrometry (MS)
	X17797	10.14272/VEKBUDDBMJNFNK-UHFFFAOYSA-N/CHMO0000630	LSH-R322A_IR	020a23a3-1525-47e2-93a9-f2cc4e36f02c	CHMO:0000630 | infrared absorption spectroscopy (IR)
LSH-R422-A	X19130
	X19130	10.14272/UFXVPOPCEVYKQB-UHFFFAOYSA-N/CHMO0000593	LSH-R422A_1H	d44cf9ce-d7d9-4732-b4af-379f0daa2aab	CHMO:0000593 | 1H nuclear magnetic resonance spectroscopy (1H NMR)
	X19130	10.14272/UFXVPOPCEVYKQB-UHFFFAOYSA-N/CHMO0000595	LSH-R422A_13C	62ff1558-ff8f-4d3d-b4d6-864808dbb84b	CHMO:0000595 | 13C nuclear magnetic resonance spectroscopy (13C NMR)
	X19130	10.14272/UFXVPOPCEVYKQB-UHFFFAOYSA-N/CHMO0001146	LSH-R422A_HSQC	68d3401d-1cc4-413c-858a-b7dff93e1b87	CHMO:0001146 | 1H--13C heteronuclear single quantum coherence (1H-13C HSQC)
	X19130	10.14272/UFXVPOPCEVYKQB-UHFFFAOYSA-N/CHMO0001148	LSH-R422A_HMBC	54d47185-4fde-4988-bb6d-7667e3c06530	CHMO:0001148 | 1H--13C heteronuclear multiple bond coherence (13C-1H HMBC)
	X19130	10.14272/UFXVPOPCEVYKQB-UHFFFAOYSA-N/CHMO0000630	LSH-R422A_IR	0de972d0-17a7-45ce-ad57-4e7bf7be3410	CHMO:0000630 | infrared absorption spectroscopy (IR)
	X19130	10.14272/UFXVPOPCEVYKQB-UHFFFAOYSA-N/CHMO0000470	LSH-R422A_MS	3dcb7327-0b49-463e-b2f4-bd9cc3859934	CHMO:0000470 | mass spectrometry (MS)
LSH-R373-E	X18664
	X18664	10.14272/HPWSELBHSNTVDQ-UHFFFAOYSA-N/CHMO0000593	LSH-R373E_1H	56f414e2-6f2d-4855-9f51-eaa9dd315814	CHMO:0000593 | 1H nuclear magnetic resonance spectroscopy (1H NMR)
	X18664	10.14272/HPWSELBHSNTVDQ-UHFFFAOYSA-N/CHMO0000595	LSH-R373E_13C	dfa8badf-a822-40b0-b7e3-d55981397e97	CHMO:0000595 | 13C nuclear magnetic resonance spectroscopy (13C NMR)
	X18664	10.14272/HPWSELBHSNTVDQ-UHFFFAOYSA-N/CHMO0001146	LSH-R373E_HSQC	1001c419-3f42-43b5-9c0d-2171abfe8798	CHMO:0001146 | 1H--13C heteronuclear single quantum coherence (1H-13C HSQC)
	X18664	10.14272/HPWSELBHSNTVDQ-UHFFFAOYSA-N/CHMO0000470	LSH-R373E_MS	0d7b6150-e844-4ab6-85aa-44e199bf3e8d	CHMO:0000470 | mass spectrometry (MS)
	X18664	10.14272/HPWSELBHSNTVDQ-UHFFFAOYSA-N/CHMO0000630	LSH-R373E_IR	b60a8107-05bb-40ec-94ea-ffe3ad90cf81	CHMO:0000630 | infrared absorption spectroscopy (IR)
LSH-R373-C	X18661
	X18661	10.14272/BZUADUCGXDAGNQ-UHFFFAOYSA-N/CHMO0000593	LSH-R373C_1H	bc8af868-d85d-4440-b93d-f7fc516ae988	CHMO:0000593 | 1H nuclear magnetic resonance spectroscopy (1H NMR)
	X18661	10.14272/BZUADUCGXDAGNQ-UHFFFAOYSA-N/CHMO0000595	LSH-R373_13C	73f03986-44fd-4dea-8c51-16c465462952	CHMO:0000595 | 13C nuclear magnetic resonance spectroscopy (13C NMR)
	X18661	10.14272/BZUADUCGXDAGNQ-UHFFFAOYSA-N/CHMO0001146	LSH-R373_HSQC	d228af92-37d7-42d0-beee-df9723366891	CHMO:0001146 | 1H--13C heteronuclear single quantum coherence (1H-13C HSQC)
	X18661	10.14272/BZUADUCGXDAGNQ-UHFFFAOYSA-N/CHMO0001148	LSH-R373C_HMBC	6e6b7da3-420c-4989-8159-6b815f27f6c6	CHMO:0001148 | 1H--13C heteronuclear multiple bond coherence (13C-1H HMBC)
	X18661	10.14272/BZUADUCGXDAGNQ-UHFFFAOYSA-N/CHMO0000470	LSH-R373C_MS_ESI	8b8ca583-714a-475b-965d-753ab437c0c5	CHMO:0000470 | mass spectrometry (MS)
	X18661	10.14272/BZUADUCGXDAGNQ-UHFFFAOYSA-N/CHMO0000470.1	LSH-R373C_MS_FAB	d887bd4c-4e22-406f-bfa0-03da290fad24	CHMO:0000470 | mass spectrometry (MS)
	X18661	10.14272/BZUADUCGXDAGNQ-UHFFFAOYSA-N/CHMO0000630	LSH-R373C_IR	9bd9557d-c726-4f69-8052-c904fa48836d	CHMO:0000630 | infrared absorption spectroscopy (IR)
LSH-R373-B	X19128
	X19128	10.14272/IMOCGYGQTYCGDY-UHFFFAOYSA-N/CHMO0000593	LSH-R373B_1H	6f62adc6-ed97-4f92-a0dd-f4d86a010065	CHMO:0000593 | 1H nuclear magnetic resonance spectroscopy (1H NMR)
	X19128	10.14272/IMOCGYGQTYCGDY-UHFFFAOYSA-N/CHMO0000595	LSH-R373B_13C	5eadd1bf-876a-4f2d-ac5a-167f753dc9d0	CHMO:0000595 | 13C nuclear magnetic resonance spectroscopy (13C NMR)
	X19128	10.14272/IMOCGYGQTYCGDY-UHFFFAOYSA-N/CHMO0001146	LSH-R373B_HSQC	1b88284e-8c30-4754-8f41-71452e595bcb	CHMO:0001146 | 1H--13C heteronuclear single quantum coherence (1H-13C HSQC)
	X19128	10.14272/IMOCGYGQTYCGDY-UHFFFAOYSA-N/CHMO0000470	LSH-R373B_MS	05898d30-a953-4abc-a98e-64d390b88d21	CHMO:0000470 | mass spectrometry (MS)
	X19128	10.14272/IMOCGYGQTYCGDY-UHFFFAOYSA-N/CHMO0000630	LSH-R373B_IR	075bb8d4-3e87-4ec0-8492-2118696a0e67	CHMO:0000630 | infrared absorption spectroscopy (IR)
LSH-R373-A	X18655
	X18655	10.14272/OGPHMCIIGIGFPL-UHFFFAOYSA-N/CHMO0000593	LSH-R373A_1H	55f13fd3-fc2c-4575-a663-1b466fa2891d	CHMO:0000593 | 1H nuclear magnetic resonance spectroscopy (1H NMR)
	X18655	10.14272/OGPHMCIIGIGFPL-UHFFFAOYSA-N/CHMO0001146	LSH-R373A_HSQC	60676be6-4a12-4379-9a21-222a994667a3	CHMO:0001146 | 1H--13C heteronuclear single quantum coherence (1H-13C HSQC)
	X18655	10.14272/OGPHMCIIGIGFPL-UHFFFAOYSA-N/CHMO0001148	LSH-R373A_HMBC	3238a373-8b95-44c0-b284-9e76ed4c8f0d	CHMO:0001148 | 1H--13C heteronuclear multiple bond coherence (13C-1H HMBC)
	X18655	10.14272/OGPHMCIIGIGFPL-UHFFFAOYSA-N/CHMO0000595	LSH-R373A_13C	c0d1ff53-b7fd-4815-99ce-bb75b672611d	CHMO:0000595 | 13C nuclear magnetic resonance spectroscopy (13C NMR)
	X18655	10.14272/OGPHMCIIGIGFPL-UHFFFAOYSA-N/CHMO0000470	LSH-R373A_MS	6c314b9c-9135-43ed-9c39-d841267f6145	CHMO:0000470 | mass spectrometry (MS)
	X18655	10.14272/OGPHMCIIGIGFPL-UHFFFAOYSA-N/CHMO0000630	LSH-R373A_IR	5bc833ca-be4a-4b09-98f0-f2baaf75c48a	CHMO:0000630 | infrared absorption spectroscopy (IR)
	X18655	10.14272/OGPHMCIIGIGFPL-UHFFFAOYSA-N/CHMO0000159	LSH-R373A_X-Ray	d0feda67-f9d2-4950-acb9-a277eadf4c05	CHMO:0000159 | single crystal X-ray diffraction (single-crystal X-ray diffraction)
	X18655	10.14272/OGPHMCIIGIGFPL-UHFFFAOYSA-N/CHMO0000292	LSH-R373A_UV-Vis	b6374102-6e20-4c58-9ad5-90aa438c9cb1	CHMO:0000292 | ultraviolet-visible spectrophotometry (UV-VIS)
LSH-R335-A	X17794
	X17794	10.14272/MKRBRLWZSNAOKA-UHFFFAOYSA-N/CHMO0000593	LSH-R335A_1H	134f04b7-f434-449d-b8e8-d2c42a9aba5a	CHMO:0000593 | 1H nuclear magnetic resonance spectroscopy (1H NMR)
	X17794	10.14272/MKRBRLWZSNAOKA-UHFFFAOYSA-N/CHMO0000595	LSH-R335A_13C	3ab0ed78-c52e-4353-805a-a6f126e71690	CHMO:0000595 | 13C nuclear magnetic resonance spectroscopy (13C NMR)
	X17794	10.14272/MKRBRLWZSNAOKA-UHFFFAOYSA-N/CHMO0001146	LSH-R335A_HSQC	ca94cd14-7758-4aed-ad3d-ec44855d9390	CHMO:0001146 | 1H--13C heteronuclear single quantum coherence (1H-13C HSQC)
	X17794	10.14272/MKRBRLWZSNAOKA-UHFFFAOYSA-N/CHMO0000470	LSH-R335A_MS	697158ed-8825-4d06-92a3-c8158c7293ec	CHMO:0000470 | mass spectrometry (MS)
	X17794	10.14272/MKRBRLWZSNAOKA-UHFFFAOYSA-N/CHMO0000630	LSH-R335A_IR	6563d204-4653-48a7-88ff-6de7c79a825e	CHMO:0000630 | infrared absorption spectroscopy (IR)
	X17794	10.14272/MKRBRLWZSNAOKA-UHFFFAOYSA-N/CHMO0001075	LSH-R335A_EA	10f3cb9d-3fe3-47bc-a06a-ec0ba56eeb51	CHMO:0001075 | elemental analysis (EA)
LSH-R168-A	X15715
	X15715	10.14272/OIHNAVUWMWBKPA-UHFFFAOYSA-N/CHMO0000593	LSH-R168A_1H	812fdb8a-e733-4cbe-b48c-a4717fde0a08	CHMO:0000593 | 1H nuclear magnetic resonance spectroscopy (1H NMR)
	X15715	10.14272/OIHNAVUWMWBKPA-UHFFFAOYSA-N/CHMO0000595	LSH-R168A_13C	41439bb9-9742-47e9-babc-78c8f053f326	CHMO:0000595 | 13C nuclear magnetic resonance spectroscopy (13C NMR)
	X15715	10.14272/OIHNAVUWMWBKPA-UHFFFAOYSA-N/CHMO0001146	LSH-R168A_HSQC	58e44872-c9c2-4ba2-9095-2c0984a5635d	CHMO:0001146 | 1H--13C heteronuclear single quantum coherence (1H-13C HSQC)
	X15715	10.14272/OIHNAVUWMWBKPA-UHFFFAOYSA-N/CHMO0001148	LSH-R168A_HMBC	f28ab74a-e8e9-4904-93e6-f0877768686f	CHMO:0001148 | 1H--13C heteronuclear multiple bond coherence (13C-1H HMBC)
	X15715	10.14272/OIHNAVUWMWBKPA-UHFFFAOYSA-N/CHMO0000630	LSH-R168A_IR	c757dfc9-b85a-48ea-abdb-c3da0619f89f	CHMO:0000630 | infrared absorption spectroscopy (IR)
	X15715	10.14272/OIHNAVUWMWBKPA-UHFFFAOYSA-N/CHMO0000470	LSH-R168A_MS	b0ea06b9-cb5d-4426-809e-9847448c9112	CHMO:0000470 | mass spectrometry (MS)
LSH-R290-A	X17127	Analysis was gained from different batches
	X17127	10.14272/VJXDMNNLLZYTRN-UHFFFAOYSA-N/CHMO0000593	LSH-R290A_1H	61e70679-b98e-4953-85a6-31537eece314	CHMO:0000593 | 1H nuclear magnetic resonance spectroscopy (1H NMR)
	X17127	10.14272/VJXDMNNLLZYTRN-UHFFFAOYSA-N/CHMO0000470	LSH-R290A_MS	64067d9c-c127-4f10-89a5-4d84fbbb9824	CHMO:0000470 | mass spectrometry (MS)
	X17127	10.14272/VJXDMNNLLZYTRN-UHFFFAOYSA-N/CHMO0000630	LSH-R290A_IR	eb4ddbe0-cee9-44ed-a788-5b852f28984c	CHMO:0000630 | infrared absorption spectroscopy (IR)
	not available	10.14272/VJXDMNNLLZYTRN-UHFFFAOYSA-N/CHMO0000595	LSH-R284A_13C	3b882cb5-9fec-4898-aff7-0547581cbfba	CHMO:0000595 | 13C nuclear magnetic resonance spectroscopy (13C NMR)
LSH-R462-A	not available
	not available	10.14272/JJCQHCJBVSOFTM-UHFFFAOYSA-N/CHMO0000593	LSH-R462A_1H	879acba8-d318-46e4-b6ef-041c89e1946c	CHMO:0000593 | 1H nuclear magnetic resonance spectroscopy (1H NMR)
	not available	10.14272/JJCQHCJBVSOFTM-UHFFFAOYSA-N/CHMO0000595	LSH-R462A_13C	8731adf6-c4a7-4e25-af2e-0aaed1893114	CHMO:0000595 | 13C nuclear magnetic resonance spectroscopy (13C NMR)
	not available	10.14272/JJCQHCJBVSOFTM-UHFFFAOYSA-N/CHMO0001146	LSH-R462A_HSQC	1eaec902-cc20-47ba-8f8b-8a2723314bb8	CHMO:0001146 | 1H--13C heteronuclear single quantum coherence (1H-13C HSQC)
	not available	10.14272/JJCQHCJBVSOFTM-UHFFFAOYSA-N/CHMO0000470	LSH-R462A_MS	0d3078c5-9485-499a-978f-cbf98d0b7a82	CHMO:0000470 | mass spectrometry (MS)
	not available	10.14272/JJCQHCJBVSOFTM-UHFFFAOYSA-N/CHMO0000630	LSH-R462A_IR	7f785a8e-2f11-49b0-b711-810827c77e5f	CHMO:0000630 | infrared absorption spectroscopy (IR)
	X17118	Material gained from other reaction with same product available
LSH-R283-A	X17116
	X17116	10.14272/CGUDGUUWCJKDIE-UHFFFAOYSA-N/CHMO0000593	LSH-R283A_1H	c8c235dd-6363-4027-9b74-43fc2a0bb2cb	CHMO:0000593 | 1H nuclear magnetic resonance spectroscopy (1H NMR)
	X17116	10.14272/CGUDGUUWCJKDIE-UHFFFAOYSA-N/CHMO0000595	LSH-R283A_13C	78823606-cb9f-4f81-863b-9c2149bb14f9	CHMO:0000595 | 13C nuclear magnetic resonance spectroscopy (13C NMR)
	X17116	10.14272/CGUDGUUWCJKDIE-UHFFFAOYSA-N/CHMO0001146	LSH-R283A_HSQC	1fc2faa9-58f5-4b9f-970e-8c2b6cc5f2e6	CHMO:0001146 | 1H--13C heteronuclear single quantum coherence (1H-13C HSQC)
	X17116	10.14272/CGUDGUUWCJKDIE-UHFFFAOYSA-N/CHMO0000470	LSH-R283A_MS	d26499fa-fa30-4b02-b825-76446160d769	CHMO:0000470 | mass spectrometry (MS)
	X17116	10.14272/CGUDGUUWCJKDIE-UHFFFAOYSA-N/CHMO0000630	LSH-R283A_IR	b7196af7-55ea-4b7b-8a5f-30e7a3d476fa	CHMO:0000630 | infrared absorption spectroscopy (IR)
	X17116	10.14272/CGUDGUUWCJKDIE-UHFFFAOYSA-N/CHMO0000292	LSH-R283A_UV-Vis	ecc866c9-e0d0-4a78-b8a7-5b2a2d46f5c1	CHMO:0000292 | ultraviolet-visible spectrophotometry (UV-VIS)
LSH-R281-A	X17108
	X17108	10.14272/UTQXOLZOCMOFPG-UHFFFAOYSA-N/CHMO0000593	LSH-R281A_1H	e8da7cc2-e3ae-4afc-93fd-ef5d2876fa17	CHMO:0000593 | 1H nuclear magnetic resonance spectroscopy (1H NMR)
	X17108	10.14272/UTQXOLZOCMOFPG-UHFFFAOYSA-N/CHMO0000595	LSH-R281A_13C	655b9575-21e3-46f4-827e-0789159d1a7b	CHMO:0000595 | 13C nuclear magnetic resonance spectroscopy (13C NMR)
	X17108	10.14272/UTQXOLZOCMOFPG-UHFFFAOYSA-N/CHMO0000470	LSH-R281A_MS	6a14a63d-3cda-42f3-bc8a-c0820b82aa12	CHMO:0000470 | mass spectrometry (MS)
	X17108	10.14272/UTQXOLZOCMOFPG-UHFFFAOYSA-N/CHMO0000630	LSH-R281A_IR	01439982-c453-4aa7-8fc2-6e5e696bab84	CHMO:0000630 | infrared absorption spectroscopy (IR)
LSH-R437-A	X19190
	X19190	10.14272/LHPVGPJSNAKQBR-UHFFFAOYSA-M/CHMO0000593	LSH-R437A_1H	21741d38-7eef-43ce-bc3a-5ae9541018b5	CHMO:0000593 | 1H nuclear magnetic resonance spectroscopy (1H NMR)
	X19190	10.14272/LHPVGPJSNAKQBR-UHFFFAOYSA-M/CHMO0000595	LSH-R437A_13C	b310717e-c385-44ed-adc6-9f5ed5596ab8	CHMO:0000595 | 13C nuclear magnetic resonance spectroscopy (13C NMR)
	X19190	10.14272/LHPVGPJSNAKQBR-UHFFFAOYSA-M/CHMO0001146	LSH-R437A_HSQC	06116da8-3635-463b-a1de-0e1d1e897f8a	CHMO:0001146 | 1H--13C heteronuclear single quantum coherence (1H-13C HSQC)
	X19190	10.14272/LHPVGPJSNAKQBR-UHFFFAOYSA-M/CHMO0000470	LSH-R437A_MS	968148ae-78d6-4c0b-9669-87fb6790e38c	CHMO:0000470 | mass spectrometry (MS)
	X19190	10.14272/LHPVGPJSNAKQBR-UHFFFAOYSA-M/CHMO0000630	LSH-R437A_IR	ddbf8871-b201-4f16-9ef4-be7bba1db400	CHMO:0000630 | infrared absorption spectroscopy (IR)
	X19190	10.14272/LHPVGPJSNAKQBR-UHFFFAOYSA-M/CHMO0000159	LSH-R437A_X-Ray	8af59939-e4de-42e8-9a7d-8861aaab1e64	CHMO:0000159 | single crystal X-ray diffraction (single-crystal X-ray diffraction)
	X19190	10.14272/LHPVGPJSNAKQBR-UHFFFAOYSA-M/CHMO0000292	LSH-R437A_UV-Vis	1999cb59-dd96-4672-b297-36f1070a8211	CHMO:0000292 | ultraviolet-visible spectrophotometry (UV-VIS)
LSH-R340-B	X18663
	X18663	10.14272/BLJPCFCXXBZYPN-UHFFFAOYSA-N/CHMO0000593	LSH-R340B_1H	6de16d17-8dbf-416d-af2c-6661b441a399	CHMO:0000593 | 1H nuclear magnetic resonance spectroscopy (1H NMR)
	X18663	10.14272/BLJPCFCXXBZYPN-UHFFFAOYSA-N/CHMO0000595	LSH-R340B_13C	107f5dbd-9371-462f-aeed-f2f1f2ccedac	CHMO:0000595 | 13C nuclear magnetic resonance spectroscopy (13C NMR)
	X18663	10.14272/BLJPCFCXXBZYPN-UHFFFAOYSA-N/CHMO0001146	LSH-R340B_HSQC	5be645be-6652-4c49-a674-fd07fae37d04	CHMO:0001146 | 1H--13C heteronuclear single quantum coherence (1H-13C HSQC)
	X18663	10.14272/BLJPCFCXXBZYPN-UHFFFAOYSA-N/CHMO0000470	LSH-R340B_MS	bddcdfcd-02dd-48e2-b5c3-da443e0ac4c6	CHMO:0000470 | mass spectrometry (MS)
	X18663	10.14272/BLJPCFCXXBZYPN-UHFFFAOYSA-N/CHMO0000630	LSH-R340B_IR	42b500d1-62aa-4f68-a29a-129cf9cb4dc1	CHMO:0000630 | infrared absorption spectroscopy (IR)
LSH-R340-A	X18632
	X18632	10.14272/WGMOCILRUYTMIW-UHFFFAOYSA-N/CHMO0000593	LSH-R340A_1H	d4822c35-905a-4553-a97b-8f607db0cf0d	CHMO:0000593 | 1H nuclear magnetic resonance spectroscopy (1H NMR)
	X18632	10.14272/WGMOCILRUYTMIW-UHFFFAOYSA-N/CHMO0000595	LSH-R340A_13C	11b348a8-5255-4e5c-af9c-3fe653a736cd	CHMO:0000595 | 13C nuclear magnetic resonance spectroscopy (13C NMR)
	X18632	10.14272/WGMOCILRUYTMIW-UHFFFAOYSA-N/CHMO0001146	LSH-R340A_HSQC	b2af62f4-5a60-4601-b1c3-164f419ce1ef	CHMO:0001146 | 1H--13C heteronuclear single quantum coherence (1H-13C HSQC)
	X18632	10.14272/WGMOCILRUYTMIW-UHFFFAOYSA-N/CHMO0001148	LSH-R340A_HMBC	d352dc08-725c-4da0-a0d2-cf08f6fb3e79	CHMO:0001148 | 1H--13C heteronuclear multiple bond coherence (13C-1H HMBC)
	X18632	10.14272/WGMOCILRUYTMIW-UHFFFAOYSA-N/CHMO0000470	LSH-R340A_MS	cfdaa401-5b26-4765-860f-600f9375d06c	CHMO:0000470 | mass spectrometry (MS)
	X18632	10.14272/WGMOCILRUYTMIW-UHFFFAOYSA-N/CHMO0000630	LSH-R340A_IR	f6bee46e-8df0-4a64-a856-aa83b9291e04	CHMO:0000630 | infrared absorption spectroscopy (IR)
LSH-R470-A	not available	Analysis was gained from different batches
	not available	10.14272/JFQQXHCZLVWKOL-UHFFFAOYSA-M/CHMO0000593	LSH-R470A_1H_DMSO	14e34dbe-3fdd-464a-b5a3-046eaaff8f88	CHMO:0000593 | 1H nuclear magnetic resonance spectroscopy (1H NMR)
	X19165	10.14272/JFQQXHCZLVWKOL-UHFFFAOYSA-M/CHMO0000630	LSH-R418_IR	18927bff-8dd4-4ffe-9f3c-8f8e5e8e4ff4	CHMO:0000630 | infrared absorption spectroscopy (IR)
	X19165	10.14272/JFQQXHCZLVWKOL-UHFFFAOYSA-M/CHMO0001075	LSH-R418A_EA	cc432868-1ac2-4263-871e-1375b1c7368c	CHMO:0001075 | elemental analysis (EA)
	X19165	10.14272/JFQQXHCZLVWKOL-UHFFFAOYSA-M/CHMO0000159	LSH-R418A_XRD	47cf3a9c-9838-4bd7-a1c9-3086d8b2a91b	CHMO:0000159 | single crystal X-ray diffraction (single-crystal X-ray diffraction)
	not available	10.14272/JFQQXHCZLVWKOL-UHFFFAOYSA-M/CHMO0000595	LSH-R470+CML-R80_13C_DMSO	5f269779-fb03-4cc4-aff0-16c544cb168b	CHMO:0000595 | 13C nuclear magnetic resonance spectroscopy (13C NMR)
	not available	10.14272/JFQQXHCZLVWKOL-UHFFFAOYSA-M/CHMO0000292	LSH-R470_UV-Vis	ddfc322a-f9d5-4d22-b313-8c44d99f6897	CHMO:0000292 | ultraviolet-visible spectrophotometry (UV-VIS)
LSH-R186-A	not available	Analysis was gained from different batches
	not available	10.14272/QYOUUXWQIVRDNZ-UHFFFAOYSA-N/CHMO0000593	LSH-R195A_1H	738dd515-b067-40c3-ad66-3a75fc35e4d9	CHMO:0000593 | 1H nuclear magnetic resonance spectroscopy (1H NMR)
	X15736	10.14272/QYOUUXWQIVRDNZ-UHFFFAOYSA-N/CHMO0000595	LSH-R181A_13C	9cf5a3f3-3f10-4c4a-b131-ebdff9ea2fda	CHMO:0000595 | 13C nuclear magnetic resonance spectroscopy (13C NMR)
	X15736	10.14272/QYOUUXWQIVRDNZ-UHFFFAOYSA-N/CHMO0000470	LSH-R181A_MS	4bd4e2f9-7e4b-4ce0-910d-df539f62ee8c	CHMO:0000470 | mass spectrometry (MS)
	X15736	10.14272/QYOUUXWQIVRDNZ-UHFFFAOYSA-N/CHMO0000630	LSH-R181A_IR	b0746d32-f8f9-484f-83a4-4917104f14f2	CHMO:0000630 | infrared absorption spectroscopy (IR)
	not available	10.14272/QYOUUXWQIVRDNZ-UHFFFAOYSA-N/CHMO0000292	new	f35abe54-db0c-484c-a4c9-99c7f16cf761	CHMO:0000292 | ultraviolet-visible spectrophotometry (UV-VIS)
LSH-R393-A	X18910
	X18910	10.14272/AOUCPYFCRAWRNU-UHFFFAOYSA-N/CHMO0000593	LSH-R393A_1H	a12d59ef-2330-4cef-b7cd-275d9badf3bf	CHMO:0000593 | 1H nuclear magnetic resonance spectroscopy (1H NMR)
	X18910	10.14272/AOUCPYFCRAWRNU-UHFFFAOYSA-N/CHMO0000595	LSH-R393A_13C	d5653642-be86-475d-8347-190e75236e64	CHMO:0000595 | 13C nuclear magnetic resonance spectroscopy (13C NMR)
	X18910	10.14272/AOUCPYFCRAWRNU-UHFFFAOYSA-N/CHMO0001146	LSH-R393A_HSQC	c5a84f0d-04b6-479b-83f4-7943ca4e4809	CHMO:0001146 | 1H--13C heteronuclear single quantum coherence (1H-13C HSQC)
	X18910	10.14272/AOUCPYFCRAWRNU-UHFFFAOYSA-N/CHMO0001150	LSH-R393A_COSY	eb2809ab-ce69-4cbc-99c7-ca3770ab2793	CHMO:0001150 | 1H--1H correlation spectroscopy (1H-1H COSY)
	X18910	10.14272/AOUCPYFCRAWRNU-UHFFFAOYSA-N/CHMO0000470	LSH-R393A_MS	7fe8d9c3-3af9-4a56-a6d2-1563777d5c5e	CHMO:0000470 | mass spectrometry (MS)
	X18910	10.14272/AOUCPYFCRAWRNU-UHFFFAOYSA-N/CHMO0000630	LSH-R393A_IR	270c5469-ee1a-4084-aa30-80a45503eb64	CHMO:0000630 | infrared absorption spectroscopy (IR)
LSH-R435-C	not available	Analysis was gained from different batches
	not available	10.14272/ICMDLGQTBHAPKS-UHFFFAOYSA-N/CHMO0000593	LSH-R435C_1H	e3abc9c1-c20d-48b4-a245-d54aed08f9d5	CHMO:0000593 | 1H nuclear magnetic resonance spectroscopy (1H NMR)
	X18959	10.14272/ICMDLGQTBHAPKS-UHFFFAOYSA-N/CHMO0000595	LSH-R405C_13C	bbf888ea-7dad-4128-9cba-d674a4159ea4	CHMO:0000595 | 13C nuclear magnetic resonance spectroscopy (13C NMR)
	X18959	10.14272/ICMDLGQTBHAPKS-UHFFFAOYSA-N/CHMO0001146	LSH-R405C_HSQC	da6761ab-7791-443f-846a-9e05629ef582	CHMO:0001146 | 1H--13C heteronuclear single quantum coherence (1H-13C HSQC)
	X18959	10.14272/ICMDLGQTBHAPKS-UHFFFAOYSA-N/CHMO0000597	LSH-R405C_19F	d02867d1-60f2-4601-8dba-37d6bf140402	CHMO:0000597 | 19F nuclear magnetic resonance spectroscopy (19F NMR)
	X18959	10.14272/ICMDLGQTBHAPKS-UHFFFAOYSA-N/CHMO0000630	LSH-R405C_IR	92cc9ca7-d6fe-4c66-abdc-591fb12ed36b	CHMO:0000630 | infrared absorption spectroscopy (IR)
	X18959	10.14272/ICMDLGQTBHAPKS-UHFFFAOYSA-N/CHMO0000470	LSH-R405C_MS	cfe084e3-8261-44c9-8d20-8b8a786f87f1	CHMO:0000470 | mass spectrometry (MS)
LSH-R435-A	not available	Analysis was gained from different batches
	not available	10.14272/HZQOUMBELHPHLV-UHFFFAOYSA-N/CHMO0000593	LSH-R435A_1H	3c635393-b678-4a79-8413-bb396f3418bd	CHMO:0000593 | 1H nuclear magnetic resonance spectroscopy (1H NMR)
	X17779	10.14272/HZQOUMBELHPHLV-UHFFFAOYSA-N/CHMO0000630	CML-R77A_IR	abf9eddd-612f-4d3f-ae84-acbb0e19caed	CHMO:0000630 | infrared absorption spectroscopy (IR)
	X17779	10.14272/HZQOUMBELHPHLV-UHFFFAOYSA-N/CHMO0000597	CML-R77A_19F	e7cd3be1-4a8b-410c-aa2e-43e815b02ec4	CHMO:0000597 | 19F nuclear magnetic resonance spectroscopy (19F NMR)
	X17779	10.14272/HZQOUMBELHPHLV-UHFFFAOYSA-N/CHMO0000470	CML-R77A_MS	834f1f95-ecb7-4158-abe5-ec34587d4b22	CHMO:0000470 | mass spectrometry (MS)
	X17779	10.14272/HZQOUMBELHPHLV-UHFFFAOYSA-N/CHMO0000596	CML-R77A_DEPT90	129f53a9-028d-4f41-911e-953b73ef2b9e	CHMO:0000596 | distortionless enhancement with polarization transfer (DEPT)
	X17779	10.14272/HZQOUMBELHPHLV-UHFFFAOYSA-N/CHMO0000596.1	CML-R77A_DEPT135	fb77aa3e-ec9b-466a-9260-1ca60deb4350	CHMO:0000596 | distortionless enhancement with polarization transfer (DEPT)
	not available	10.14272/HZQOUMBELHPHLV-UHFFFAOYSA-N/CHMO0000595	LSH-R435A_13C	d13d0268-6251-4f39-bbc8-c57631366bd4	CHMO:0000595 | 13C nuclear magnetic resonance spectroscopy (13C NMR)
	not available	10.14272/HZQOUMBELHPHLV-UHFFFAOYSA-N/CHMO0001146	LSH-R435A_HSQC	470cc6fb-435a-4e31-aca6-9f2c0219d5e1	CHMO:0001146 | 1H--13C heteronuclear single quantum coherence (1H-13C HSQC)
	not available	10.14272/HZQOUMBELHPHLV-UHFFFAOYSA-N/CHMO0001075	LSH-R434A_EA	5e7aafe4-b32d-4441-8f35-96b429005ca1	CHMO:0001075 | elemental analysis (EA)
LSH-R435-B	not available	Analysis was gained from different batches
	not available	10.14272/VVNPRYRWMNIXCI-UHFFFAOYSA-N/CHMO0000593	LSH-R435B_1H	357f76ca-71f2-4c1a-83a2-8b7df39f4c8a	CHMO:0000593 | 1H nuclear magnetic resonance spectroscopy (1H NMR)
	X18946	10.14272/VVNPRYRWMNIXCI-UHFFFAOYSA-N/CHMO0000595	LSH-R405B_13C	c4e3adff-3f2a-4dbf-a29d-acbffae83807	CHMO:0000595 | 13C nuclear magnetic resonance spectroscopy (13C NMR)
	X18946	10.14272/VVNPRYRWMNIXCI-UHFFFAOYSA-N/CHMO0001146	LSH-R405B_HSQC	922d1450-8408-416c-95d8-d7f0fa5514cb	CHMO:0001146 | 1H--13C heteronuclear single quantum coherence (1H-13C HSQC)
	X18946	10.14272/VVNPRYRWMNIXCI-UHFFFAOYSA-N/CHMO0000597	LSH-R405B_19F	49fde744-953f-433c-b0a6-189c5d8d2503	CHMO:0000597 | 19F nuclear magnetic resonance spectroscopy (19F NMR)
	X18946	10.14272/VVNPRYRWMNIXCI-UHFFFAOYSA-N/CHMO0000630	LSH-R405B_IR	2256bf26-8278-4b3b-bb9c-5cab3ee8b4a9	CHMO:0000630 | infrared absorption spectroscopy (IR)
	not available	10.14272/VVNPRYRWMNIXCI-UHFFFAOYSA-N/CHMO0000470	LSH-R419/420B_MS	499dedbc-3b46-45d0-82d4-58feb113fae0	CHMO:0000470 | mass spectrometry (MS)
LSH-R280-A	X17196
	X17196	10.14272/STOASOOVVADOKH-UHFFFAOYSA-N/CHMO0000593	LSH-R280A_1H	3af09aa9-25a8-4317-b2e5-6509814d0767	CHMO:0000593 | 1H nuclear magnetic resonance spectroscopy (1H NMR)
	X17196	10.14272/STOASOOVVADOKH-UHFFFAOYSA-N/CHMO0000595	LSH-R280A_13C	4cd39512-e31e-47ce-b5f5-f49c7f676f42	CHMO:0000595 | 13C nuclear magnetic resonance spectroscopy (13C NMR)
	X17196	10.14272/STOASOOVVADOKH-UHFFFAOYSA-N/CHMO0000470	LSH-R280A_MS	478e6214-081a-435a-95f0-e202035ffc7f	CHMO:0000470 | mass spectrometry (MS)
	X17196	10.14272/STOASOOVVADOKH-UHFFFAOYSA-N/CHMO0000630	LSH-R280A_IR	3454236b-7777-4caf-b911-30c9359728f5	CHMO:0000630 | infrared absorption spectroscopy (IR)
	X17196	10.14272/STOASOOVVADOKH-UHFFFAOYSA-N/CHMO0001146	LSH-R280A_HSQC	b4eb3d06-b6a4-4e5f-8878-b3e1f5ccff59	CHMO:0001146 | 1H--13C heteronuclear single quantum coherence (1H-13C HSQC)
LSH-R221-A	X16173	Analysis was gained from two batches
	X16173	10.14272/AHSWENVYXHLEHF-UHFFFAOYSA-N/CHMO0000593	LSH-R221A_1H	cf584f80-26fa-4ce7-a57b-8f831dda2f97	CHMO:0000593 | 1H nuclear magnetic resonance spectroscopy (1H NMR)
	X16173	10.14272/AHSWENVYXHLEHF-UHFFFAOYSA-N/CHMO0000595	LSH-R221A_13C	fcb1261a-7942-47d3-b10f-9efbdd87a873	CHMO:0000595 | 13C nuclear magnetic resonance spectroscopy (13C NMR)
	X16173	10.14272/AHSWENVYXHLEHF-UHFFFAOYSA-N/CHMO0000470	LSH-R221A_MS	2f515180-7142-48b8-a573-3d5905a12d0d	CHMO:0000470 | mass spectrometry (MS)
	X16173	10.14272/AHSWENVYXHLEHF-UHFFFAOYSA-N/CHMO0000630	LSH-R221A_IR	0ac8f977-447b-405a-84d1-5915754392d0	CHMO:0000630 | infrared absorption spectroscopy (IR)
		10.14272/AHSWENVYXHLEHF-UHFFFAOYSA-N/CHMO0000292	LSH-R447A_UV/Vis	400c2886-1990-4a8f-9633-529fd359d1d8	CHMO:0000292 | ultraviolet-visible spectrophotometry (UV-VIS)
LSH-R62-A	not available	Analysis was gained from two batches
	not available	10.14272/BVEPTXWZDNARLY-UHFFFAOYSA-N/CHMO0000593	LSH-R62_1H	b31e13c8-9c47-4ce1-b9c2-c88726af1c3d	CHMO:0000593 | 1H nuclear magnetic resonance spectroscopy (1H NMR)
	not available	10.14272/BVEPTXWZDNARLY-UHFFFAOYSA-N/CHMO0000595	LSH-R62_13C	7d95aa12-4a3d-4f79-a5fe-69dce7ab50e6	CHMO:0000595 | 13C nuclear magnetic resonance spectroscopy (13C NMR)
	X12529	10.14272/BVEPTXWZDNARLY-UHFFFAOYSA-N/CHMO0000630	LSH-R55_IR	607a74da-65ec-4f3c-96d0-a4d72c9a1bf4	CHMO:0000630 | infrared absorption spectroscopy (IR)
	X12529	10.14272/BVEPTXWZDNARLY-UHFFFAOYSA-N/CHMO0000470	LSH-R55_MS	b652b0d9-7b50-409d-9845-a238e66c0eab	CHMO:0000470 | mass spectrometry (MS)
LSH-R120-A	not available	Analysis was gained from two batches
	not available	10.14272/NOGLKXWLUDJZDQ-UHFFFAOYSA-N/CHMO0000593	LSH-R120_1H	b41fe93b-f91a-4bf2-9636-8b4a25193497	CHMO:0000593 | 1H nuclear magnetic resonance spectroscopy (1H NMR)
	not available	10.14272/NOGLKXWLUDJZDQ-UHFFFAOYSA-N/CHMO0000597	LSH-R120_19F	6f7a57ae-5d37-4a6e-b04b-8ba4d0183db8	CHMO:0000597 | 19F nuclear magnetic resonance spectroscopy (19F NMR)
	not available	10.14272/NOGLKXWLUDJZDQ-UHFFFAOYSA-N/CHMO0000595	LSH-R120A_13C	daae6ad7-b3ad-4dd5-8ca4-b350aa7b68fb	CHMO:0000595 | 13C nuclear magnetic resonance spectroscopy (13C NMR)
	X13040	10.14272/NOGLKXWLUDJZDQ-UHFFFAOYSA-N/CHMO0000470	LSH-R89A_MS	96643b34-3270-47ff-9aa7-fbf22efb5ee8	CHMO:0000470 | mass spectrometry (MS)
	X13040	10.14272/NOGLKXWLUDJZDQ-UHFFFAOYSA-N/CHMO0000630	LSH-R89A_IR	f053cb6a-1af4-45e1-89b2-0d4cadfca78c	CHMO:0000630 | infrared absorption spectroscopy (IR)
LSH-R97-A	X13183
	X13183	10.14272/ALUDOBBDYFOFJP-UHFFFAOYSA-N/CHMO0000593	LSH-R97A_1H	d6ca9025-2cde-45e2-b58f-413368d3a7e1	CHMO:0000593 | 1H nuclear magnetic resonance spectroscopy (1H NMR)
	X13183	10.14272/ALUDOBBDYFOFJP-UHFFFAOYSA-N/CHMO0000595	LSH-R97A_13C	1972229b-30fa-442f-8470-7d9218a1ac26	CHMO:0000595 | 13C nuclear magnetic resonance spectroscopy (13C NMR)
	X13183	10.14272/ALUDOBBDYFOFJP-UHFFFAOYSA-N/CHMO0000597	LSH-R97A_19F	1a3f0e30-bc56-4a42-945d-6ee77f2393f5	CHMO:0000597 | 19F nuclear magnetic resonance spectroscopy (19F NMR)
	X13183	10.14272/ALUDOBBDYFOFJP-UHFFFAOYSA-N/CHMO0000630	LSH-R97A_IR	4e82a986-10c0-410f-a750-2db18b5d6554	CHMO:0000630 | infrared absorption spectroscopy (IR)
	X13183	10.14272/ALUDOBBDYFOFJP-UHFFFAOYSA-N/CHMO0000482	LSH-R97A_ESI	54fcc46c-e310-4221-a252-c0b4e5b47dc9	CHMO:0000482 | electrospray ionisation mass spectrometry (ESMS)
LSH-R171-A	not available
	not available	10.14272/LGMVEBQKPYIMMI-UHFFFAOYSA-N/CHMO0000593.1	R171A_1H	d016df0e-5bb6-40e6-94a3-21bb201cac78	CHMO:0000593 | 1H nuclear magnetic resonance spectroscopy (1H NMR)
	not available	10.14272/LGMVEBQKPYIMMI-UHFFFAOYSA-N/CHMO0000595.1	R171A_13C	3d85ebc0-1119-4597-8825-f93804ba512a	CHMO:0000595 | 13C nuclear magnetic resonance spectroscopy (13C NMR)
	not available	10.14272/LGMVEBQKPYIMMI-UHFFFAOYSA-N/CHMO0000470.1	R212A_MS	13722571-4bcf-4dc9-82fc-afeb7b3833d7	CHMO:0000470 | mass spectrometry (MS)
	not available	10.14272/LGMVEBQKPYIMMI-UHFFFAOYSA-N/CHMO0000630.1	R212A_IR	900671c1-fb45-401a-a208-b7b56d83bcb7	CHMO:0000630 | infrared absorption spectroscopy (IR)
	X13035	Material gained from other reaction with same product available
LSH-R47-A	X12439
	X12439	10.14272/CXZSDEGQLBZWEC-UHFFFAOYSA-N/CHMO0000593	LSH-R47_1H-NMR	ad00e7e8-fdf2-4b7f-a2c6-ec0fabb14854	CHMO:0000593 | 1H nuclear magnetic resonance spectroscopy (1H NMR)
	X12439	10.14272/CXZSDEGQLBZWEC-UHFFFAOYSA-N/CHMO0000595	LSH-R47_13C-NMR	e69c3fda-9d11-4612-bf2f-580058d55b40	CHMO:0000595 | 13C nuclear magnetic resonance spectroscopy (13C NMR)
	X12439	10.14272/CXZSDEGQLBZWEC-UHFFFAOYSA-N/CHMO0000630	LSH-R47A_IR	09a1c51a-f64b-4c7e-bc7f-f7e200cba4e0	CHMO:0000630 | infrared absorption spectroscopy (IR)
	X12439	10.14272/CXZSDEGQLBZWEC-UHFFFAOYSA-N/CHMO0000470	LSH-R47A_EI-MS	475749a1-6a17-4db2-9919-8348849520e8	CHMO:0000470 | mass spectrometry (MS)
LSH-R41-A	X12540
	X12540	10.14272/ABJFBJGGLJVMAQ-UHFFFAOYSA-N/CHMO0000593	LSH-R41_1H-NMR	4354954d-c312-405f-8a80-04ef7e18d6ab	CHMO:0000593 | 1H nuclear magnetic resonance spectroscopy (1H NMR)
	X12540	10.14272/ABJFBJGGLJVMAQ-UHFFFAOYSA-N/CHMO0000595	LSH-R41_13C-NMR	d731690f-7132-4347-a77b-af018ff1718c	CHMO:0000595 | 13C nuclear magnetic resonance spectroscopy (13C NMR)
	X12540	10.14272/ABJFBJGGLJVMAQ-UHFFFAOYSA-N/CHMO0000630	LSH-R41_IR	a939bd0c-bc8d-4650-b6b8-7f38379c0bdd	CHMO:0000630 | infrared absorption spectroscopy (IR)
	X12540	10.14272/ABJFBJGGLJVMAQ-UHFFFAOYSA-N/CHMO0000470	LSH-R41_MS	3a857f1a-a495-49d5-9c52-08592fafe715	CHMO:0000470 | mass spectrometry (MS)
LSH-R330-A	X17793
	X17793	10.14272/UEHBPGWWVJRPTJ-UHFFFAOYSA-N/CHMO0000593	LSH-R330A_1H	a760ca31-8e63-47df-8d66-3fd4a9fc5f91	CHMO:0000593 | 1H nuclear magnetic resonance spectroscopy (1H NMR)
	X17793	10.14272/UEHBPGWWVJRPTJ-UHFFFAOYSA-N/CHMO0000595	LSH-R330A_13C	eba1f631-b30c-49c6-9ee3-1e9156e7df92	CHMO:0000595 | 13C nuclear magnetic resonance spectroscopy (13C NMR)
	X17793	10.14272/UEHBPGWWVJRPTJ-UHFFFAOYSA-N/CHMO0000470	LSH-R330A_MS	3ec93213-0bf0-4b61-9926-ec495eb2b826	CHMO:0000470 | mass spectrometry (MS)
	X17793	10.14272/UEHBPGWWVJRPTJ-UHFFFAOYSA-N/CHMO0000630	LSH-R330A_IR	035fe34b-fe34-4279-8488-a797c8f429e5	CHMO:0000630 | infrared absorption spectroscopy (IR)
LSH-R326-A	X17790
	X17790	10.14272/ZRDHYUMEEXJHJN-UHFFFAOYSA-N/CHMO0000593	LSH-R326A_1H	5b1f10b3-86fe-4156-b258-513845379d65	CHMO:0000593 | 1H nuclear magnetic resonance spectroscopy (1H NMR)
	X17790	10.14272/ZRDHYUMEEXJHJN-UHFFFAOYSA-N/CHMO0000595	LSH-R326A_13C	ead57ee3-555d-4142-ac03-1c27d4fb3aa4	CHMO:0000595 | 13C nuclear magnetic resonance spectroscopy (13C NMR)
	X17790	10.14272/ZRDHYUMEEXJHJN-UHFFFAOYSA-N/CHMO0000470	LSH-R326A_MS	196326c7-514d-4640-b773-183c8f0381ae	CHMO:0000470 | mass spectrometry (MS)
	X17790	10.14272/ZRDHYUMEEXJHJN-UHFFFAOYSA-N/CHMO0000630	LSH-R326A_IR	6fb08b26-898f-47b9-9a18-c226c49acc21	CHMO:0000630 | infrared absorption spectroscopy (IR)
LSH-R261-A	X16393
	X16393	10.14272/CWFPSKVBKAPBPV-UHFFFAOYSA-N/CHMO0000593	LSH-R261A_1H	34b4bf83-7fcd-4469-9332-c1c00fc3f52d	CHMO:0000593 | 1H nuclear magnetic resonance spectroscopy (1H NMR)
	X16393	10.14272/CWFPSKVBKAPBPV-UHFFFAOYSA-N/CHMO0000595	LSH-R261A_13C	08c94977-9b6a-47a6-89fc-0c3bd4ead8e5	CHMO:0000595 | 13C nuclear magnetic resonance spectroscopy (13C NMR)
	X16393	10.14272/CWFPSKVBKAPBPV-UHFFFAOYSA-N/CHMO0000470	LSH-R261A_MS	8bb61aad-ac7c-4c4c-bac5-3cf2836683ff	CHMO:0000470 | mass spectrometry (MS)
	X16393	10.14272/CWFPSKVBKAPBPV-UHFFFAOYSA-N/CHMO0000630	LSH-R261A_IR	984128ed-7b45-4a10-8c06-9690abc829c0	CHMO:0000630 | infrared absorption spectroscopy (IR)
LSH-R156-A	X15500
	X15500	10.14272/RODNZCIFRICALV-UHFFFAOYSA-N/CHMO0000593.1	LSH-R156A_1H	477bc0f2-6541-4207-b978-40804e49e8fa	CHMO:0000593 | 1H nuclear magnetic resonance spectroscopy (1H NMR)
	X15500	10.14272/RODNZCIFRICALV-UHFFFAOYSA-N/CHMO0000595.1	LSH-R156A_13C	02057493-6871-4037-846f-eb950b34b101	CHMO:0000595 | 13C nuclear magnetic resonance spectroscopy (13C NMR)
	X15500	10.14272/RODNZCIFRICALV-UHFFFAOYSA-N/CHMO0000630.1	LSH-R156A_IR	246a9403-c422-4c93-820a-58973fee72be	CHMO:0000630 | infrared absorption spectroscopy (IR)
	X15500	10.14272/RODNZCIFRICALV-UHFFFAOYSA-N/CHMO0000470.1	LSH-R156A_MS	119b53bb-2bd4-441d-9463-1dbbad30dcf6	CHMO:0000470 | mass spectrometry (MS)
LSH-R337-A	X17460
	X17460	10.14272/RRWJGDBWTOAAFG-UHFFFAOYSA-N/CHMO0000593	LSH-R337A_1H	e675e9dd-608d-43e6-a8d0-84398d9e1f4f	CHMO:0000593 | 1H nuclear magnetic resonance spectroscopy (1H NMR)
	X17460	10.14272/RRWJGDBWTOAAFG-UHFFFAOYSA-N/CHMO0000595	LSH-R337A_13C	fb6ede0b-fa9e-471a-ab79-c68e8c833fd1	CHMO:0000595 | 13C nuclear magnetic resonance spectroscopy (13C NMR)
	X17460	10.14272/RRWJGDBWTOAAFG-UHFFFAOYSA-N/CHMO0000470	LSH-R337A_MS	9e9642cc-ea37-4a03-ba8b-fbe769b57b8f	CHMO:0000470 | mass spectrometry (MS)
	X17460	10.14272/RRWJGDBWTOAAFG-UHFFFAOYSA-N/CHMO0000630	LSH-R337A_IR	a3dd9802-9c0b-4beb-99bd-cd2c73c02e79	CHMO:0000630 | infrared absorption spectroscopy (IR)
LSH-R94-A	X13151
	X13151	10.14272/DSMMAQWRRJQVTQ-UHFFFAOYSA-N/CHMO0000593	LSH-R94A_1H	63bf2424-7b84-47e4-a073-5099df1a4ca5	CHMO:0000593 | 1H nuclear magnetic resonance spectroscopy (1H NMR)
	X13151	10.14272/DSMMAQWRRJQVTQ-UHFFFAOYSA-N/CHMO0000595	LSH-R94_13C	f5b83b83-a671-49d6-a379-51a3f4474740	CHMO:0000595 | 13C nuclear magnetic resonance spectroscopy (13C NMR)
	X13151	10.14272/DSMMAQWRRJQVTQ-UHFFFAOYSA-N/CHMO0000597	LSH-R94A_19F	65ec088d-cfb9-4a02-99e0-cc3a431af0a0	CHMO:0000597 | 19F nuclear magnetic resonance spectroscopy (19F NMR)
	X13151	10.14272/DSMMAQWRRJQVTQ-UHFFFAOYSA-N/CHMO0000630	LSH-R94A_IR	6c2e3c60-0ec5-4530-9f18-514d14c56606	CHMO:0000630 | infrared absorption spectroscopy (IR)
	X13151	10.14272/DSMMAQWRRJQVTQ-UHFFFAOYSA-N/CHMO0000470	LSH-R94A_ESI	8bd4c10c-5cf0-4b57-8501-95f770572e00	CHMO:0000470 | mass spectrometry (MS)
	X13151	10.14272/DSMMAQWRRJQVTQ-UHFFFAOYSA-N/CHMO0000596	LSH-R94A_DEPT	67466a47-67da-4218-b10a-e824f8821a35	CHMO:0000596 | distortionless enhancement with polarization transfer (DEPT)
LSH-R443-D	not available	Analysis was gained from two batches
	not available	10.14272/IRSRPTQGLZTLGL-UHFFFAOYSA-N/CHMO0000593	LSH-R443D_1H	874a8539-279d-45de-b4d9-01fbbab43ba1	CHMO:0000593 | 1H nuclear magnetic resonance spectroscopy (1H NMR)
	X19706	10.14272/IRSRPTQGLZTLGL-UHFFFAOYSA-N/CHMO0000595	LSH-R452D_13C	a2ce9541-2306-4992-8f1c-ae451f57e41c	CHMO:0000595 | 13C nuclear magnetic resonance spectroscopy (13C NMR)
	X19706	10.14272/IRSRPTQGLZTLGL-UHFFFAOYSA-N/CHMO0001146	LSH-R452D_HSQC	d3711239-c2d6-4693-ac4a-081fa79f70c1	CHMO:0001146 | 1H--13C heteronuclear single quantum coherence (1H-13C HSQC)
	X19706	10.14272/IRSRPTQGLZTLGL-UHFFFAOYSA-N/CHMO0001148	LSH-R452D_HMBC	825801cb-c010-41f9-965b-457a1baf72ee	CHMO:0001148 | 1H--13C heteronuclear multiple bond coherence (13C-1H HMBC)
	X19706	10.14272/IRSRPTQGLZTLGL-UHFFFAOYSA-N/CHMO0000470	LSH-R452D_MS	1b8ca501-09da-431a-a34b-d69ea003ff71	CHMO:0000470 | mass spectrometry (MS)
	X19706	10.14272/IRSRPTQGLZTLGL-UHFFFAOYSA-N/CHMO0000630	LSH-R452D_IR	99290cbc-c74f-463a-903b-d39cddb66822	CHMO:0000630 | infrared absorption spectroscopy (IR)
LSH-R443-B	not available	Analysis was gained from two batches
	not available	10.14272/AFQHYVRVQPQNNN-UHFFFAOYSA-N/CHMO0000593	LSH-R443+452B_1H	c881bf94-7784-4052-b8c9-aec277dad70e	CHMO:0000593 | 1H nuclear magnetic resonance spectroscopy (1H NMR)
	not available	10.14272/AFQHYVRVQPQNNN-UHFFFAOYSA-N/CHMO0000595	LSH-R443+452B	7d58eaae-19dc-4a3b-b6b0-5720dbccc959	CHMO:0000595 | 13C nuclear magnetic resonance spectroscopy (13C NMR)
	X18637	10.14272/AFQHYVRVQPQNNN-UHFFFAOYSA-N/CHMO0000470	LSH-R343B_MS	2a7104ad-53eb-409c-b0ef-73ddb0c3ca9a	CHMO:0000470 | mass spectrometry (MS)
	X18637	10.14272/AFQHYVRVQPQNNN-UHFFFAOYSA-N/CHMO0000630	LSH-R343B_IR	c3610fae-6cb3-4760-a26f-927f1a381a04	CHMO:0000630 | infrared absorption spectroscopy (IR)
	X18637	10.14272/AFQHYVRVQPQNNN-UHFFFAOYSA-N/CHMO0001146	LSH-R343B_HSQC	0200226a-1f23-400d-bb36-7739bb5025ef	CHMO:0001146 | 1H--13C heteronuclear single quantum coherence (1H-13C HSQC)
	X18637	10.14272/AFQHYVRVQPQNNN-UHFFFAOYSA-N/CHMO0001148	LSH-R343B_HMBC	873ca70d-a323-480b-8b23-46ddab9e1b9b	CHMO:0001148 | 1H--13C heteronuclear multiple bond coherence (13C-1H HMBC)
LSH-R443-A	X19162
	X19162	10.14272/YKTZEDKRYOIMNU-UHFFFAOYSA-N/CHMO0000595	LSH-R443A_13C	d9fdd3b5-367f-4bf9-81b4-2192523e676d	CHMO:0000595 | 13C nuclear magnetic resonance spectroscopy (13C NMR)
	X19162	10.14272/YKTZEDKRYOIMNU-UHFFFAOYSA-N/CHMO0000593	LSH-R443A_1H	d8fcf6e4-37ca-499d-83d1-a9018b4d110f	CHMO:0000593 | 1H nuclear magnetic resonance spectroscopy (1H NMR)
	X19162	10.14272/YKTZEDKRYOIMNU-UHFFFAOYSA-N/CHMO0001146	LSH-R443A_HSQC	a887dc29-3b3e-411b-954b-5d3bfd5b1c6b	CHMO:0001146 | 1H--13C heteronuclear single quantum coherence (1H-13C HSQC)
	X19162	10.14272/YKTZEDKRYOIMNU-UHFFFAOYSA-N/CHMO0001148	LSH-R443A_HMBC	430a596c-6618-49b7-a18c-4d650018ebbc	CHMO:0001148 | 1H--13C heteronuclear multiple bond coherence (13C-1H HMBC)
	X19162	10.14272/YKTZEDKRYOIMNU-UHFFFAOYSA-N/CHMO0000470	LSH-R443A_MS_FAB	57e8aa31-4555-4ed5-8cbe-b754524cd678	CHMO:0000470 | mass spectrometry (MS)
	X19162	10.14272/YKTZEDKRYOIMNU-UHFFFAOYSA-N/CHMO0000630	LSH-R443A_IR	5dffff94-0a64-4b16-afab-6b7c946a22eb	CHMO:0000630 | infrared absorption spectroscopy (IR)
LSH-R444-A	X19160
	X19160	10.14272/IYHBIYUJPQGBCO-UHFFFAOYSA-M/CHMO0000593	LSH-R444A_1H	d720d1f5-fd0b-40db-bc63-02819d824e9c	CHMO:0000593 | 1H nuclear magnetic resonance spectroscopy (1H NMR)
	X19160	10.14272/IYHBIYUJPQGBCO-UHFFFAOYSA-M/CHMO0000595	LSH-R444A_13C	b1faaa6a-9899-40d3-8794-345277c940ea	CHMO:0000595 | 13C nuclear magnetic resonance spectroscopy (13C NMR)
	X19160	10.14272/IYHBIYUJPQGBCO-UHFFFAOYSA-M/CHMO0001146	LSH-R444A_HSQC	4e29723c-6edc-477f-be5a-0275d3dcbf93	CHMO:0001146 | 1H--13C heteronuclear single quantum coherence (1H-13C HSQC)
	X19160	10.14272/IYHBIYUJPQGBCO-UHFFFAOYSA-M/CHMO0001150	LSH-R444A_COSY	dbd7518d-89d9-4753-8e15-6e041d2f5a16	CHMO:0001150 | 1H--1H correlation spectroscopy (1H-1H COSY)
	X19160	10.14272/IYHBIYUJPQGBCO-UHFFFAOYSA-M/CHMO0000470	LSH-R444A_MS	e1e8978c-468e-4e9a-bd5d-9914891904ec	CHMO:0000470 | mass spectrometry (MS)
	X19160	10.14272/IYHBIYUJPQGBCO-UHFFFAOYSA-M/CHMO0000630	LSH-R444A_IR	304329b6-4d04-488c-bdf9-9076c8a0975b	CHMO:0000630 | infrared absorption spectroscopy (IR)
	X19160	10.14272/IYHBIYUJPQGBCO-UHFFFAOYSA-M/CHMO0000159	LSH-R444A_XRD	a17a68b1-87f3-4e86-997a-39e342b145c6	CHMO:0000159 | single crystal X-ray diffraction (single-crystal X-ray diffraction)
	X19160	10.14272/IYHBIYUJPQGBCO-UHFFFAOYSA-M/CHMO0001075	LSH-R444A_EA	bc44ddf3-f5fd-4019-9a36-5d9563a24a2b	CHMO:0001075 | elemental analysis (EA)
	X19160	10.14272/IYHBIYUJPQGBCO-UHFFFAOYSA-M/CHMO0000292	LSH-R444A_UV-Vis	d0f3e7c6-36e3-4ae3-8b77-67aacf675b00	CHMO:0000292 | ultraviolet-visible spectrophotometry (UV-VIS)
LSH-R377-B	not available	Analysis was gained from two batches
	not available	10.14272/STMGCUUVVSSYBM-UHFFFAOYSA-N/CHMO0000593	LSH-R377B_1H	67677fc4-e1ee-4a69-96be-79420066093b	CHMO:0000593 | 1H nuclear magnetic resonance spectroscopy (1H NMR)
	not available	10.14272/STMGCUUVVSSYBM-UHFFFAOYSA-N/CHMO0000595	LSH-R377B_13C	c6ab7abe-1100-44cd-b8ec-802f00af02ad	CHMO:0000595 | 13C nuclear magnetic resonance spectroscopy (13C NMR)
	not available	10.14272/STMGCUUVVSSYBM-UHFFFAOYSA-N/CHMO0000597	LSH-R377B_19F	daf4bbe5-f7de-430b-877b-ccf69f45da16	CHMO:0000597 | 19F nuclear magnetic resonance spectroscopy (19F NMR)
	X16172	10.14272/STMGCUUVVSSYBM-UHFFFAOYSA-N/CHMO0001146	LSH-R207B_HSQC	683cf10e-2066-4dfa-b221-5d129bf486f4	CHMO:0001146 | 1H--13C heteronuclear single quantum coherence (1H-13C HSQC)
	X16172	10.14272/STMGCUUVVSSYBM-UHFFFAOYSA-N/CHMO0000470	LSH-R207B_MS	dce01aef-636b-4ce0-b444-f81fb11c65ad	CHMO:0000470 | mass spectrometry (MS)
	X16172	10.14272/STMGCUUVVSSYBM-UHFFFAOYSA-N/CHMO0000630	LSH-R207B_IR	28d28713-32e9-4560-a300-098b1a34f40f	CHMO:0000630 | infrared absorption spectroscopy (IR)
LSH-R377-A	not available	Analysis was gained from three batches
	not available	10.14272/YXIJMMYJFBYEEB-UHFFFAOYSA-N/CHMO0000593	LSH-R377A_1H	3578710d-0096-490b-8b17-54e02616b79a	CHMO:0000593 | 1H nuclear magnetic resonance spectroscopy (1H NMR)
	not available	10.14272/YXIJMMYJFBYEEB-UHFFFAOYSA-N/CHMO0000595	LSH-R429A_13C	0f3d1946-01e9-404c-902f-883b627bacfc	CHMO:0000595 | 13C nuclear magnetic resonance spectroscopy (13C NMR)
	X17775	10.14272/YXIJMMYJFBYEEB-UHFFFAOYSA-N/CHMO0000597	CML-R59A_19F	0a3993ad-96c2-4d54-9dbd-7be8312049c4	CHMO:0000597 | 19F nuclear magnetic resonance spectroscopy (19F NMR)
	X17775	10.14272/YXIJMMYJFBYEEB-UHFFFAOYSA-N/CHMO0000596	CML-R59A_HSQC	c6ca0ced-7861-4b52-b225-a1046e0a3216	CHMO:0000596 | distortionless enhancement with polarization transfer (DEPT)
	X17775	10.14272/YXIJMMYJFBYEEB-UHFFFAOYSA-N/CHMO0001148	CML-R59A_HMBC	afe289d7-f601-407e-8b43-c7d66dc61e9f	CHMO:0001148 | 1H--13C heteronuclear multiple bond coherence (13C-1H HMBC)
	X17775	10.14272/YXIJMMYJFBYEEB-UHFFFAOYSA-N/CHMO0000470	CML-R59A_MS	ce88c6c1-1603-4e1f-be99-9a1f3804fcf9	CHMO:0000470 | mass spectrometry (MS)
	X17775	10.14272/YXIJMMYJFBYEEB-UHFFFAOYSA-N/CHMO0000630	CML-R59A_IR	84fb7a35-33b1-4edc-b41f-f713cf797c71	CHMO:0000630 | infrared absorption spectroscopy (IR)
	not available	10.14272/YXIJMMYJFBYEEB-UHFFFAOYSA-N/CHMO0001075	LSH-R429A_EA	a3b0e62f-e44f-4d10-8524-60c268953e1d	CHMO:0001075 | elemental analysis (EA)
LSH-R474-A	X19761
	X19761	10.14272/DDQBGZVUDRTHAU-UHFFFAOYSA-M/CHMO0000593	LSH-R474A_1H	623c537a-d79b-4359-867b-244bb543d893	CHMO:0000593 | 1H nuclear magnetic resonance spectroscopy (1H NMR)
	X19761	10.14272/DDQBGZVUDRTHAU-UHFFFAOYSA-M/CHMO0000595	LSH-R474A_13C	3a2381cc-3315-44a6-816b-2af9749f80d5	CHMO:0000595 | 13C nuclear magnetic resonance spectroscopy (13C NMR)
	X19761	10.14272/DDQBGZVUDRTHAU-UHFFFAOYSA-M/CHMO0001146	LSH-R474A_HSQC	84ccbbb8-5488-499a-91d3-bd5c56ff15c9	CHMO:0001146 | 1H--13C heteronuclear single quantum coherence (1H-13C HSQC)
	X19761	10.14272/DDQBGZVUDRTHAU-UHFFFAOYSA-M/CHMO0000630	LSH-R474A_IR	a3da5e5c-37ac-49e2-ad19-6ccf2bf2d1e2	CHMO:0000630 | infrared absorption spectroscopy (IR)
	X19761	10.14272/DDQBGZVUDRTHAU-UHFFFAOYSA-M/CHMO0000159	LSH-R474A_XRD	2eebf41e-ba7e-431c-857b-dae5793e1c3a	CHMO:0000159 | single crystal X-ray diffraction (single-crystal X-ray diffraction)
	X19761	10.14272/DDQBGZVUDRTHAU-UHFFFAOYSA-M/CHMO0000470	LSH-R474A_MS	61d1010e-0b88-47a6-a843-2c88fed530f2	CHMO:0000470 | mass spectrometry (MS)
		10.14272/DDQBGZVUDRTHAU-UHFFFAOYSA-M/CHMO0000292	LSH-R474A_UV-Vis	bd2b6326-5427-4d69-83dc-6a07b36c123c	CHMO:0000292 | ultraviolet-visible spectrophotometry (UV-VIS)
LSH-R464-B	X19758
	X19758	10.14272/CWXIXBIIISVJRL-UHFFFAOYSA-N/CHMO0000593	LSH-R464B_1H	ef6fb278-2962-44f0-9509-67279a0fa68d	CHMO:0000593 | 1H nuclear magnetic resonance spectroscopy (1H NMR)
	X19758	10.14272/CWXIXBIIISVJRL-UHFFFAOYSA-N/CHMO0000595	LSH-R464B_13C	f98fe3f5-3c9b-4167-afd4-f953b7130b62	CHMO:0000595 | 13C nuclear magnetic resonance spectroscopy (13C NMR)
	X19758	10.14272/CWXIXBIIISVJRL-UHFFFAOYSA-N/CHMO0001146	LSH-R464B_HSQC	c15598bb-4122-44f9-9c25-91c4174c89a8	CHMO:0001146 | 1H--13C heteronuclear single quantum coherence (1H-13C HSQC)
	X19758	10.14272/CWXIXBIIISVJRL-UHFFFAOYSA-N/CHMO0000470	LSH-R464B_MS	cb3b46f8-e7e8-4527-821b-52a2b3ed8596	CHMO:0000470 | mass spectrometry (MS)
	not available	10.14272/CWXIXBIIISVJRL-UHFFFAOYSA-N/CHMO0000630	CML-R72A_IR	75160da2-c04f-4c00-8bb5-1651926badd5	CHMO:0000630 | infrared absorption spectroscopy (IR)
LSH-R464-C	not available
	not available	10.14272/NOFJFBHOKPHILH-UHFFFAOYSA-N/CHMO0000593.2	LSH-R464C_1H	b2a1218d-579f-4b20-9101-cb7b3eb2b021	CHMO:0000593 | 1H nuclear magnetic resonance spectroscopy (1H NMR)
	X14000	Material gained from other reaction with same product available
LSH-R364-C	X18693
	X18693	10.14272/XAKPOUMBAWIAJL-UHFFFAOYSA-N/CHMO0000593	LSH-R364C_1H	b97dd9e0-884a-45c1-bb7a-11ed3f00f4b5	CHMO:0000593 | 1H nuclear magnetic resonance spectroscopy (1H NMR)
	X18693	10.14272/XAKPOUMBAWIAJL-UHFFFAOYSA-N/CHMO0000595	LSH-R364C_13C	a203715a-d464-456a-ac67-b659d3d31160	CHMO:0000595 | 13C nuclear magnetic resonance spectroscopy (13C NMR)
	X18693	10.14272/XAKPOUMBAWIAJL-UHFFFAOYSA-N/CHMO0001146	LSH-R364C_HSQC	3b651aad-dac6-46c2-b2fc-9a79ef003c79	CHMO:0001146 | 1H--13C heteronuclear single quantum coherence (1H-13C HSQC)
	X18693	10.14272/XAKPOUMBAWIAJL-UHFFFAOYSA-N/CHMO0000470	LSH-R364C_MS	70dcd556-ef84-4813-beb7-f36a65134b7b	CHMO:0000470 | mass spectrometry (MS)
	X18693	10.14272/XAKPOUMBAWIAJL-UHFFFAOYSA-N/CHMO0000630	LSH-R364C_IR	4a59f193-2aed-4270-b7e3-0bf1074697fb	CHMO:0000630 | infrared absorption spectroscopy (IR)
LSH-R364-A	not available	Analysis was gained from two batches
	not available	10.14272/DHVXGDPBGBTTOC-UHFFFAOYSA-N/CHMO0000593	LSH-R364A_1H	8412d940-d7bb-4918-8cdd-6f86432bac40	CHMO:0000593 | 1H nuclear magnetic resonance spectroscopy (1H NMR)
	X17789	10.14272/DHVXGDPBGBTTOC-UHFFFAOYSA-N/CHMO0000595	LSH-R206C_13C	5c59efac-3d39-4638-85c1-04a089151116	CHMO:0000595 | 13C nuclear magnetic resonance spectroscopy (13C NMR)
	X17789	10.14272/DHVXGDPBGBTTOC-UHFFFAOYSA-N/CHMO0001146	LSH-R206C_HSQC	e7e69801-a76e-407a-82fc-9d62189f64e0	CHMO:0001146 | 1H--13C heteronuclear single quantum coherence (1H-13C HSQC)
	X17789	10.14272/DHVXGDPBGBTTOC-UHFFFAOYSA-N/CHMO0000596	LSH-R206C_DEPT90	3e78dad4-8b8f-42a0-a669-55de690a4ec6	CHMO:0000596 | distortionless enhancement with polarization transfer (DEPT)
	X17789	10.14272/DHVXGDPBGBTTOC-UHFFFAOYSA-N/CHMO0000596.1	LSH-R206C_DEPT135	afa4a6bf-ea8d-4a4c-b319-5f7fd5af5822	CHMO:0000596 | distortionless enhancement with polarization transfer (DEPT)
	X17789	10.14272/DHVXGDPBGBTTOC-UHFFFAOYSA-N/CHMO0001148	LSH-R206C_HMBC	ec40c737-f959-4550-97bc-0e14b6a0b751	CHMO:0001148 | 1H--13C heteronuclear multiple bond coherence (13C-1H HMBC)
	X17789	10.14272/DHVXGDPBGBTTOC-UHFFFAOYSA-N/CHMO0000470	LSH-R206C_MS	c1d91d90-2721-4370-a2dc-7cf1534235c1	CHMO:0000470 | mass spectrometry (MS)
	X17789	10.14272/DHVXGDPBGBTTOC-UHFFFAOYSA-N/CHMO0000630	LSH-R206C_IR	3f1f10db-aa86-46c8-8384-75bd38ccba5e	CHMO:0000630 | infrared absorption spectroscopy (IR)
LSH-R364-B	X18654
	X18654	10.14272/LDKDBUVLGOHXSC-UHFFFAOYSA-N/CHMO0000593	LSH-R364B_1H	34a47ded-7643-4fdf-bfaa-6369958899ec	CHMO:0000593 | 1H nuclear magnetic resonance spectroscopy (1H NMR)
	X18654	10.14272/LDKDBUVLGOHXSC-UHFFFAOYSA-N/CHMO0000595	LSH-R364B_13C	b74edaa7-58f7-4881-bcaf-96a95a531730	CHMO:0000595 | 13C nuclear magnetic resonance spectroscopy (13C NMR)
	X18654	10.14272/LDKDBUVLGOHXSC-UHFFFAOYSA-N/CHMO0001146	LSH-R364B_HSQC	63cfc2ad-9e03-4e0a-8e75-2f19301f6578	CHMO:0001146 | 1H--13C heteronuclear single quantum coherence (1H-13C HSQC)
	X18654	10.14272/LDKDBUVLGOHXSC-UHFFFAOYSA-N/CHMO0001148	LSH-R364B_HMBC	7dddfede-9d3b-4d0c-bb1a-8a4416d9b4a2	CHMO:0001148 | 1H--13C heteronuclear multiple bond coherence (13C-1H HMBC)
	X18654	10.14272/LDKDBUVLGOHXSC-UHFFFAOYSA-N/CHMO0000596	LSH-R364B_DEPT90	bd7f2099-08ac-46b7-a8f0-eb0d3be07103	CHMO:0000596 | distortionless enhancement with polarization transfer (DEPT)
	X18654	10.14272/LDKDBUVLGOHXSC-UHFFFAOYSA-N/CHMO0000596.1	LSH-R364B_DEPT135	ddacbc96-b55d-4b51-ae85-3b11f7de9254	CHMO:0000596 | distortionless enhancement with polarization transfer (DEPT)
	X18654	10.14272/LDKDBUVLGOHXSC-UHFFFAOYSA-N/CHMO0000470	LSH-R364B_MS	d2139f90-29d4-4b25-885d-09db81e7a412	CHMO:0000470 | mass spectrometry (MS)
	X18654	10.14272/LDKDBUVLGOHXSC-UHFFFAOYSA-N/CHMO0000630	LSH-R364B_IR	5f263879-bdb0-4a44-8b2c-65aaac6caa3b	CHMO:0000630 | infrared absorption spectroscopy (IR)
LSH-R181-A
	X15736	10.14272/QYOUUXWQIVRDNZ-UHFFFAOYSA-N/CHMO0000593.1	LSH-R470_starting material	26d70c1f-e1dd-463d-bdb5-ac33d83e9025	CHMO:0000593 | 1H nuclear magnetic resonance spectroscopy (1H NMR)
LSH-R484-A	X20024
	X20024	10.14272/BKFBOTQHKAJKOY-UHFFFAOYSA-M/CHMO0000470	LSH-R484A_MS	e6267400-20f8-4de5-b3f8-347cde47acd8	CHMO:0000470 | mass spectrometry (MS)
	X20024	10.14272/BKFBOTQHKAJKOY-UHFFFAOYSA-M/CHMO0000630	LSH-R484A_IR	16ac4afd-4a25-428f-a5d0-b73dc12c36ee	CHMO:0000630 | infrared absorption spectroscopy (IR)
	X20024	10.14272/BKFBOTQHKAJKOY-UHFFFAOYSA-M/CHMO0000159	LSH-R484A_XRD	66968f91-917b-41bb-afac-228c1a440b6c	CHMO:0000159 | single crystal X-ray diffraction (single-crystal X-ray diffraction)
	X20024	10.14272/BKFBOTQHKAJKOY-UHFFFAOYSA-M/CHMO0000593	LSH-R484A_1H	b81128d7-38ef-4b29-84bb-52f0c5cd00c2	CHMO:0000593 | 1H nuclear magnetic resonance spectroscopy (1H NMR)
	X20024	10.14272/BKFBOTQHKAJKOY-UHFFFAOYSA-M/CHMO0000595	LSH-R484A_13C	9c1470d0-a996-4704-904c-6825752484c8	CHMO:0000595 | 13C nuclear magnetic resonance spectroscopy (13C NMR)
	X20024	10.14272/BKFBOTQHKAJKOY-UHFFFAOYSA-M/CHMO0001146	LSH-R484A_HSQC	1c3e41fa-e3e0-4efc-b75e-fa1fc4ace8e0	CHMO:0001146 | 1H--13C heteronuclear single quantum coherence (1H-13C HSQC)
	X20024		LSH-R484A_UV-Vis	d3e1909f-0083-4191-8a03-69be72564dea	CHMO:0000792 | ultraviolet-visible-near infrared spectrophotometry (UV-VIS-NIR)
CML-R81-A	not available	Analysis was gained from two batches
	not available	10.14272/YEBFONFGCJEMAG-UHFFFAOYSA-N/CHMO0000593	CML-81 F25-34 1H	21f432dc-d052-460d-b913-fa61b11ffeb8	CHMO:0000593 | 1H nuclear magnetic resonance spectroscopy (1H NMR)
	not available	10.14272/YEBFONFGCJEMAG-UHFFFAOYSA-N/CHMO0000595	CML-81 F25-34 13C	3171448e-574a-4171-b515-61ae0cd66d48	CHMO:0000595 | 13C nuclear magnetic resonance spectroscopy (13C NMR)
	not available	10.14272/YEBFONFGCJEMAG-UHFFFAOYSA-N/CHMO0000596	CML-81 F25-34 90 DEPT	2a2e915c-bf7f-44be-9b4c-d0358cab8faf	CHMO:0000596 | distortionless enhancement with polarization transfer (DEPT)
	not available	10.14272/YEBFONFGCJEMAG-UHFFFAOYSA-N/CHMO0000596.1	CML-81 F25-34 135 DEPT	fbb40dcc-2575-4b19-8ea2-78a6d6917594	CHMO:0000596 | distortionless enhancement with polarization transfer (DEPT)
	X16895	10.14272/YEBFONFGCJEMAG-UHFFFAOYSA-N/CHMO0000470	LSH-R224A_MS	246d829c-bfcd-4ef1-a4bb-0b2e1d656d53	CHMO:0000470 | mass spectrometry (MS)
	X16895	10.14272/YEBFONFGCJEMAG-UHFFFAOYSA-N/CHMO0000630	LSH-R224A_IR	cb527031-bf2f-40bf-a415-47fd395c4232	CHMO:0000630 | infrared absorption spectroscopy (IR)
CML-R57-B	not available
	not available	10.14272/LGMVEBQKPYIMMI-UHFFFAOYSA-N/CHMO0000593.2	CML-57 F7-12 1H	ed2ab9e8-f3aa-42e3-9d37-1f9e2d15fdd4	CHMO:0000593 | 1H nuclear magnetic resonance spectroscopy (1H NMR)
	X13035	Material gained from other reaction with same product
CML-R82-A	X17776
	X17776	10.14272/LDJGUGHGVWKPPC-UHFFFAOYSA-N/CHMO0000593	CML-82-F11-19 1H	19707581-8318-4f90-98ea-bcc8f00c621d	CHMO:0000593 | 1H nuclear magnetic resonance spectroscopy (1H NMR)
	X17776	10.14272/LDJGUGHGVWKPPC-UHFFFAOYSA-N/CHMO0000595	CML-82 F11-19 13C	4d69d4da-570e-4fd8-b99e-182579d7c830	CHMO:0000595 | 13C nuclear magnetic resonance spectroscopy (13C NMR)
	X17776	10.14272/LDJGUGHGVWKPPC-UHFFFAOYSA-N/CHMO0000596	CML-82 F11-19 90 DEPT	54ee111b-fb5a-4454-8b88-7390d030654f	CHMO:0000596 | distortionless enhancement with polarization transfer (DEPT)
	X17776	10.14272/LDJGUGHGVWKPPC-UHFFFAOYSA-N/CHMO0000596.1	CML-82 F11-19 135 DEPT	446b8d2b-750b-4a0d-9c88-11f8999dfeb8	CHMO:0000596 | distortionless enhancement with polarization transfer (DEPT)
	X17776	10.14272/LDJGUGHGVWKPPC-UHFFFAOYSA-N/CHMO0000470	CML-82A_MS	2112a876-0131-4b31-b3dc-19819938fb8e	CHMO:0000470 | mass spectrometry (MS)
	X17776	10.14272/LDJGUGHGVWKPPC-UHFFFAOYSA-N/CHMO0000630	CML-82A_IR	44fb39b6-5942-46dd-839c-910cdd355813	CHMO:0000630 | infrared absorption spectroscopy (IR)
	X17776	10.14272/LDJGUGHGVWKPPC-UHFFFAOYSA-N/CHMO0001075	CML-82_EA	4f12b625-2fc6-4be7-b9ca-5db1240070ce	CHMO:0001075 | elemental analysis (EA)
CML-R36-A	X17185
	X17185	10.14272/CCAUEKYEPREEHO-UHFFFAOYSA-M/CHMO0000593.2	CML-36 F27-36 1H	617bb9a3-984e-447f-9760-65f845dc4bed	CHMO:0000593 | 1H nuclear magnetic resonance spectroscopy (1H NMR)
	X17185	10.14272/CCAUEKYEPREEHO-UHFFFAOYSA-M/CHMO0000595	CML-36 F27-36 13C	66df37c6-eca1-4ea4-aad9-42da5b5018b8	CHMO:0000595 | 13C nuclear magnetic resonance spectroscopy (13C NMR)
	X17185	10.14272/CCAUEKYEPREEHO-UHFFFAOYSA-M/CHMO0000596.4	CML-36 F27-36 90 DEPT	2f8a896b-b0df-4568-b4f1-f1d4813a168a	CHMO:0000596 | distortionless enhancement with polarization transfer (DEPT)
	X17185	10.14272/CCAUEKYEPREEHO-UHFFFAOYSA-M/CHMO0000596.5	CML-36 F27-36 135 DEPT	4d234740-32a1-4807-9ce5-bd3f6896e31a	CHMO:0000596 | distortionless enhancement with polarization transfer (DEPT)
	X17185	10.14272/CCAUEKYEPREEHO-UHFFFAOYSA-M/CHMO0000630.2	CML-36 IR	859e5ffd-654a-4bcc-acc3-c32406b1fc38	CHMO:0000630 | infrared absorption spectroscopy (IR)
	X17185	10.14272/CCAUEKYEPREEHO-UHFFFAOYSA-M/CHMO0000470.2	CML-36 MS	e18754e0-2741-4adc-9dc3-43d83c6cd53a	CHMO:0000470 | mass spectrometry (MS)
	X17185	10.14272/CCAUEKYEPREEHO-UHFFFAOYSA-M/CHMO0001075	CML-36 EA	18ee2879-9fb4-4e89-b447-54dc682a1bc1	CHMO:0001075 | elemental analysis (EA)
	X17185	10.14272/CCAUEKYEPREEHO-UHFFFAOYSA-M/CHMO0000156	CML-36 X-Ray	1031d7fd-6dbc-4527-9579-ee1afa30272a	CHMO:0000156 | X-ray diffraction (XRD)
	not available	10.14272/CCAUEKYEPREEHO-UHFFFAOYSA-M/CHMO0000292	LSH-R415A_UV-Vis	599e1922-0b4c-4a81-bce1-2f5687b632a9	CHMO:0000292 | ultraviolet-visible spectrophotometry (UV-VIS)
CML-R17-A	X17109
	X17109	10.14272/DGJCBVVQEVQILV-UHFFFAOYSA-N/CHMO0000593	CML-17 1H	a7e8a984-9d3e-4575-a543-a1eb5af6e767	CHMO:0000593 | 1H nuclear magnetic resonance spectroscopy (1H NMR)
	X17109	10.14272/DGJCBVVQEVQILV-UHFFFAOYSA-N/CHMO0000595	CML-17 13C	76800d49-b37a-47ab-bf47-522c1baad7f1	CHMO:0000595 | 13C nuclear magnetic resonance spectroscopy (13C NMR)
	X17109	10.14272/DGJCBVVQEVQILV-UHFFFAOYSA-N/CHMO0000596	CML-17 90 DEPT	54b59d7b-d76f-4b73-91c6-0e6db39d54b3	CHMO:0000596 | distortionless enhancement with polarization transfer (DEPT)
	X17109	10.14272/DGJCBVVQEVQILV-UHFFFAOYSA-N/CHMO0000596.1	CML-17 135 DEPT	70179735-0e3e-4e06-bfc0-5a7a69144826	CHMO:0000596 | distortionless enhancement with polarization transfer (DEPT)
	X17109	10.14272/DGJCBVVQEVQILV-UHFFFAOYSA-N/CHMO0000470	CML-17 MS	7c89f34b-bba6-432b-a526-cb777bfa9138	CHMO:0000470 | mass spectrometry (MS)
	X17109	10.14272/DGJCBVVQEVQILV-UHFFFAOYSA-N/CHMO0000630	CML-17 IR	bec37cc1-aac3-42df-8bb7-a65db09bb406	CHMO:0000630 | infrared absorption spectroscopy (IR)
CML-R27-A	X17130
	X17130	10.14272/FEZUXVAXRREZEP-UHFFFAOYSA-N/CHMO0000593	CML-27 F34-36 1H	45ecdadf-c9f5-4090-b527-b81a037a31d8	CHMO:0000593 | 1H nuclear magnetic resonance spectroscopy (1H NMR)
	X17130	10.14272/FEZUXVAXRREZEP-UHFFFAOYSA-N/CHMO0000595	CML-27 F34-36 13C	9eceb76a-5df3-4f09-b738-8b69e5f6e106	CHMO:0000595 | 13C nuclear magnetic resonance spectroscopy (13C NMR)
	X17130	10.14272/FEZUXVAXRREZEP-UHFFFAOYSA-N/CHMO0000630	CML-27 IR	a96b3ff4-cf71-4f3f-bfa4-3f8bd6dc502a	CHMO:0000630 | infrared absorption spectroscopy (IR)
	X17130	10.14272/FEZUXVAXRREZEP-UHFFFAOYSA-N/CHMO0000470	CML-27 MS	b579605b-a530-4d11-bd10-51abc7deb329	CHMO:0000470 | mass spectrometry (MS)
CML-R34-A	X17135
	X17135	10.14272/FDGHOWIPSINAHA-UHFFFAOYSA-N/CHMO0000593	CML-34 F10-15 1H	180ba44a-f2c2-452b-8846-09349ff36ba9	CHMO:0000593 | 1H nuclear magnetic resonance spectroscopy (1H NMR)
	X17135	10.14272/FDGHOWIPSINAHA-UHFFFAOYSA-N/CHMO0000595	CML-34 F10-15 13C	5ed1d740-a9a4-436b-bbd9-039166c55bc2	CHMO:0000595 | 13C nuclear magnetic resonance spectroscopy (13C NMR)
	X17135	10.14272/FDGHOWIPSINAHA-UHFFFAOYSA-N/CHMO0000596	CML-34 F10-15 90 DEPT	9586d9af-8fed-4b89-9043-ccad72846df3	CHMO:0000596 | distortionless enhancement with polarization transfer (DEPT)
	X17135	10.14272/FDGHOWIPSINAHA-UHFFFAOYSA-N/CHMO0000596.1	CML-34 F10-15 135 DEPT	23a6b296-5b30-4de8-b1d8-95a62a7b5cfe	CHMO:0000596 | distortionless enhancement with polarization transfer (DEPT)
	X17135	10.14272/FDGHOWIPSINAHA-UHFFFAOYSA-N/CHMO0000630.1	CML-34 IR	b0186388-a490-4990-b3c0-f75a4de24b5b	CHMO:0000630 | infrared absorption spectroscopy (IR)
	X17135	10.14272/FDGHOWIPSINAHA-UHFFFAOYSA-N/CHMO0000470.1	CML-34 MS	8cd1341f-dbab-4c67-9abc-1972e30dd29b	CHMO:0000470 | mass spectrometry (MS)
CML-R20-A	not available
	not available	10.14272/SJCZTVUAGLTCCV-UHFFFAOYSA-N/CHMO0000593.1	CML-20 F20-29 1H	faf44a9b-a1f6-4e2d-8749-ab8eecf977ed	CHMO:0000593 | 1H nuclear magnetic resonance spectroscopy (1H NMR)
	not available	10.14272/SJCZTVUAGLTCCV-UHFFFAOYSA-N/CHMO0000595.1	CML-20 13C	634435f0-c073-4b68-8021-4656cef0684e	CHMO:0000595 | 13C nuclear magnetic resonance spectroscopy (13C NMR)
	not available	10.14272/SJCZTVUAGLTCCV-UHFFFAOYSA-N/CHMO0000596.2	CML-20 90 DEPT	7c46f812-9fd8-43a2-9751-2b7e1aebbef2	CHMO:0000596 | distortionless enhancement with polarization transfer (DEPT)
	not available	10.14272/SJCZTVUAGLTCCV-UHFFFAOYSA-N/CHMO0000596.3	CML-20 135 DEPT	831e13b0-96b9-431b-bee3-f6730fbe8e03	CHMO:0000596 | distortionless enhancement with polarization transfer (DEPT)
	not available	10.14272/SJCZTVUAGLTCCV-UHFFFAOYSA-N/CHMO0000630.1	CML-20 IR	d71239aa-450d-4793-8bcb-4ad15308e553	CHMO:0000630 | infrared absorption spectroscopy (IR)
	not available	10.14272/SJCZTVUAGLTCCV-UHFFFAOYSA-N/CHMO0000470.1	CML-20 MS	94340031-e3ca-4552-bc2c-4f1978eb0fd0	CHMO:0000470 | mass spectrometry (MS)
	X17106	Material available from another batch
CML-R39-A	X17469
	X17469	10.14272/TXQZSMLFWOHBGX-UHFFFAOYSA-N/CHMO0000593	CML-39 F10-13 1H	ad12e3ac-265d-4eea-a76b-63738dc9c531	CHMO:0000593 | 1H nuclear magnetic resonance spectroscopy (1H NMR)
	X17469	10.14272/TXQZSMLFWOHBGX-UHFFFAOYSA-N/CHMO0000595	CML-39 F10-13 13C	9224f572-909a-49ba-81bb-dc0a37994fdc	CHMO:0000595 | 13C nuclear magnetic resonance spectroscopy (13C NMR)
	X17469	10.14272/TXQZSMLFWOHBGX-UHFFFAOYSA-N/CHMO0000596	CML-39 F10-13 90 DEPT	ba1c5780-9411-4454-b576-954e045bda30	CHMO:0000596 | distortionless enhancement with polarization transfer (DEPT)
	X17469	10.14272/TXQZSMLFWOHBGX-UHFFFAOYSA-N/CHMO0000596.1	CML-39 F10-13 135 DEPT	41efb396-5c7a-489a-b2a2-4f8ed838d7dd	CHMO:0000596 | distortionless enhancement with polarization transfer (DEPT)
	X17469	10.14272/TXQZSMLFWOHBGX-UHFFFAOYSA-N/CHMO0000470	CML-39 F10-13 MS	9dc79028-245c-44c4-9c42-e4cbc741ff27	CHMO:0000470 | mass spectrometry (MS)
	X17469	10.14272/TXQZSMLFWOHBGX-UHFFFAOYSA-N/CHMO0000630	CML-39 F10-13 IR	ec9803e7-e24f-4df0-a87c-192c2cbfc2b9	CHMO:0000630 | infrared absorption spectroscopy (IR)
CML-R38-A	X17492
	X17492	10.14272/KUVSJEDELBLMHP-UHFFFAOYSA-N/CHMO0000595	CML-38 13C	8f50e93b-60c1-4a27-9a71-377c47cbb353	CHMO:0000595 | 13C nuclear magnetic resonance spectroscopy (13C NMR)
	X17492	10.14272/KUVSJEDELBLMHP-UHFFFAOYSA-N/CHMO0000596	CML-38 135 DEPT	92400c1e-906f-44e0-9a42-61b76d2cbf7f	CHMO:0000596 | distortionless enhancement with polarization transfer (DEPT)
	X17492	10.14272/KUVSJEDELBLMHP-UHFFFAOYSA-N/CHMO0000596.1	CML-38 90 DEPT	d83df6ad-04c4-444b-ae7d-21f0aa3e2ea7	CHMO:0000596 | distortionless enhancement with polarization transfer (DEPT)
	X17492	10.14272/KUVSJEDELBLMHP-UHFFFAOYSA-N/CHMO0000593	CML-38 1H	0d573077-b6e9-4bef-b144-d701056c34f7	CHMO:0000593 | 1H nuclear magnetic resonance spectroscopy (1H NMR)
	X17492	10.14272/KUVSJEDELBLMHP-UHFFFAOYSA-N/CHMO0000470	CML-38 MS without the Cl	237d4a05-a44e-4911-a9ee-333d3905064e	CHMO:0000470 | mass spectrometry (MS)
	X17492	10.14272/KUVSJEDELBLMHP-UHFFFAOYSA-N/CHMO0000630	CML-38 IR	071dc626-fb56-46db-b0b0-97ba0d8a7240	CHMO:0000630 | infrared absorption spectroscopy (IR)
	X17492	10.14272/KUVSJEDELBLMHP-UHFFFAOYSA-N/CHMO0001146	CML-R38_HSQC	256562a8-be24-4368-a938-d84f6760b706	CHMO:0001146 | 1H--13C heteronuclear single quantum coherence (1H-13C HSQC)
CML-R33-A	X17140
	X17140	10.14272/MXGSQRZNSJHGEP-UHFFFAOYSA-N/CHMO0000593	CML-33 F14-22 1H	d3526c91-83ca-4d63-bc0e-6d742a65ec2b	CHMO:0000593 | 1H nuclear magnetic resonance spectroscopy (1H NMR)
	X17140	10.14272/MXGSQRZNSJHGEP-UHFFFAOYSA-N/CHMO0000595	CML-33 F14-22 13C	bbf8a211-007d-4a6f-b088-c918e7a9ff4c	CHMO:0000595 | 13C nuclear magnetic resonance spectroscopy (13C NMR)
	X17140	10.14272/MXGSQRZNSJHGEP-UHFFFAOYSA-N/CHMO0000596	CML-33 F14-22 90 DEPT	030888f2-c201-4b4b-8c4b-0cb539e7da16	CHMO:0000596 | distortionless enhancement with polarization transfer (DEPT)
	X17140	10.14272/MXGSQRZNSJHGEP-UHFFFAOYSA-N/CHMO0000596.1	CML-33 F14-22 135 DEPT	1e6740b1-1c0f-42e2-b61f-22a51c75452a	CHMO:0000596 | distortionless enhancement with polarization transfer (DEPT)
	X17140	10.14272/MXGSQRZNSJHGEP-UHFFFAOYSA-N/CHMO0000630	CML-33 IR	d1da3eb8-9354-4947-8998-b767c83b04fe	CHMO:0000630 | infrared absorption spectroscopy (IR)
	X17140	10.14272/MXGSQRZNSJHGEP-UHFFFAOYSA-N/CHMO0000470	CML-33 MS	00049886-5a74-407c-a663-b4e270f68f4d	CHMO:0000470 | mass spectrometry (MS)
CML-R32-A	X17475
	X17475	10.14272/GCJKJVPZVSPCQI-UHFFFAOYSA-N/CHMO0000593	CML-32.3 F1-7 1H	03e23656-ebb8-4551-b4b7-2d57f1c929e8	CHMO:0000593 | 1H nuclear magnetic resonance spectroscopy (1H NMR)
	X17475	10.14272/GCJKJVPZVSPCQI-UHFFFAOYSA-N/CHMO0000595	CML-32.3 F1-7 13C	db13fac5-336a-462d-a4de-3cbf5ad93607	CHMO:0000595 | 13C nuclear magnetic resonance spectroscopy (13C NMR)
	X17475	10.14272/GCJKJVPZVSPCQI-UHFFFAOYSA-N/CHMO0000596	CML-32.3 F1-7 90 DEPT	3914cb7d-0dd3-4cca-8c38-2f689fff5c64	CHMO:0000596 | distortionless enhancement with polarization transfer (DEPT)
	X17475	10.14272/GCJKJVPZVSPCQI-UHFFFAOYSA-N/CHMO0000596.1	CML32.3 F1-7 135 DEPT	f798bc0c-2ff0-4253-aaab-bf352f2e4a69	CHMO:0000596 | distortionless enhancement with polarization transfer (DEPT)
	X17475	10.14272/GCJKJVPZVSPCQI-UHFFFAOYSA-N/CHMO0000470	CML-32 MS	bebfc26f-351e-402a-951e-282ff7772222	CHMO:0000470 | mass spectrometry (MS)
	X17475	10.14272/GCJKJVPZVSPCQI-UHFFFAOYSA-N/CHMO0000630	CML-32 IR	8646c266-cdc1-4a9c-a0a7-a42f7a769036	CHMO:0000630 | infrared absorption spectroscopy (IR)
CML-R26-A	X17126
	X17126	10.14272/GRLFMIQVCULKIR-UHFFFAOYSA-N/CHMO0000593	CML-26 F1 1H	bbebde5f-f269-4c26-a875-d560bea85ce1	CHMO:0000593 | 1H nuclear magnetic resonance spectroscopy (1H NMR)
	X17126	10.14272/GRLFMIQVCULKIR-UHFFFAOYSA-N/CHMO0000596	CML-26 90 DEPT	851239f9-6308-4881-a1fb-e191c5fb79d5	CHMO:0000596 | distortionless enhancement with polarization transfer (DEPT)
	X17126	10.14272/GRLFMIQVCULKIR-UHFFFAOYSA-N/CHMO0000596.1	CML-26 135 DEPT	f080fd06-6e48-4dd1-b5b2-c7e70a544969	CHMO:0000596 | distortionless enhancement with polarization transfer (DEPT)
	X17126	10.14272/GRLFMIQVCULKIR-UHFFFAOYSA-N/CHMO0000595	CML-26 13C	a73a42c1-cc64-4fc7-8f07-967bf3e8effc	CHMO:0000595 | 13C nuclear magnetic resonance spectroscopy (13C NMR)
	X17126	10.14272/GRLFMIQVCULKIR-UHFFFAOYSA-N/CHMO0000630	CML-26 IR	e269af21-2b58-4b5c-bbe8-ac434a922e16	CHMO:0000630 | infrared absorption spectroscopy (IR)
	X17126	10.14272/GRLFMIQVCULKIR-UHFFFAOYSA-N/CHMO0000470	CML-26 MS without the Cl	ba9c180b-0501-4ca4-957d-25a2ff91ec8f	CHMO:0000470 | mass spectrometry (MS)
CML-R40-A	X17477
	X17477	10.14272/XJHPHMLSCVFADT-UHFFFAOYSA-N/CHMO0000593	CML-40 F6-15 1H	4b35edfd-51e1-4fee-a118-67a7af4ccf75	CHMO:0000593 | 1H nuclear magnetic resonance spectroscopy (1H NMR)
	X17477	10.14272/XJHPHMLSCVFADT-UHFFFAOYSA-N/CHMO0000595	CML-40 F6-15 13C	58086da0-22ec-41c3-aeda-3333ce7c4c53	CHMO:0000595 | 13C nuclear magnetic resonance spectroscopy (13C NMR)
	X17477	10.14272/XJHPHMLSCVFADT-UHFFFAOYSA-N/CHMO0000596	CML-40 F6-15 90 DEPT	5f7df7ff-b7c3-4762-b4a8-cd43d2f3b996	CHMO:0000596 | distortionless enhancement with polarization transfer (DEPT)
	X17477	10.14272/XJHPHMLSCVFADT-UHFFFAOYSA-N/CHMO0000596.1	CML-40 F6-15 135 DEPT	bf2b36fb-daa1-45f0-9511-d13e3fd8bf03	CHMO:0000596 | distortionless enhancement with polarization transfer (DEPT)
	X17477	10.14272/XJHPHMLSCVFADT-UHFFFAOYSA-N/CHMO0000630	CML-40 IR	d378f525-a14c-4c54-833f-1d6ef28e4798	CHMO:0000630 | infrared absorption spectroscopy (IR)
	X17477	10.14272/XJHPHMLSCVFADT-UHFFFAOYSA-N/CHMO0000470	CML-40 MS	77bd75f5-0f0d-4863-ac54-4b57f27a312d	CHMO:0000470 | mass spectrometry (MS)
CML-R58-A	X17470
	X17470	10.14272/MGHMBCSNZLEULM-UHFFFAOYSA-N/CHMO0000593	CML-58 F1-6 1H	1f583cb3-4fc1-42be-85b7-9b58b6167a64	CHMO:0000593 | 1H nuclear magnetic resonance spectroscopy (1H NMR)
	X17470	10.14272/MGHMBCSNZLEULM-UHFFFAOYSA-N/CHMO0000595	CML58 F1-6 13C	1562b89a-f253-41c2-af0c-520f17149840	CHMO:0000595 | 13C nuclear magnetic resonance spectroscopy (13C NMR)
	X17470	10.14272/MGHMBCSNZLEULM-UHFFFAOYSA-N/CHMO0000596	CML-56 F1-6 90 DEPT	0a6e9299-782d-417b-86d7-eb31adebd89d	CHMO:0000596 | distortionless enhancement with polarization transfer (DEPT)
	X17470	10.14272/MGHMBCSNZLEULM-UHFFFAOYSA-N/CHMO0000596.1	CML-56 F1-6 135 DEPT	5d28ae9c-003e-4f6f-a2da-4ec62f08f899	CHMO:0000596 | distortionless enhancement with polarization transfer (DEPT)
	X17470	10.14272/MGHMBCSNZLEULM-UHFFFAOYSA-N/CHMO0000630	CML-58 IR	73b9c435-0483-48c8-9564-92f299ea578a	CHMO:0000630 | infrared absorption spectroscopy (IR)
	X17470	10.14272/MGHMBCSNZLEULM-UHFFFAOYSA-N/CHMO0000470	CML-58 MS	a971798d-a348-4851-8d81-643c0ea49b07	CHMO:0000470 | mass spectrometry (MS)
CML-R74-B	X17764
	X17764	10.14272/ABTZHDQWMUXIFW-UHFFFAOYSA-N/CHMO0000596	CML-74 F46-52 90 DEPT	82313231-6669-49e2-83b0-c34ba6a363af	CHMO:0000596 | distortionless enhancement with polarization transfer (DEPT)
	X17764	10.14272/ABTZHDQWMUXIFW-UHFFFAOYSA-N/CHMO0000596.1	CML-74 F46-52 135 DEPT	e7a53fca-dd72-441a-8a0e-5e127329035c	CHMO:0000596 | distortionless enhancement with polarization transfer (DEPT)
	X17764	10.14272/ABTZHDQWMUXIFW-UHFFFAOYSA-N/CHMO0000593.3	CML-74 F46-52 1H	47622df3-2a6f-454f-99c3-b219cd1a4d40	CHMO:0000593 | 1H nuclear magnetic resonance spectroscopy (1H NMR)
	X17764	10.14272/ABTZHDQWMUXIFW-UHFFFAOYSA-N/CHMO0000595.2	CML-74 F46-52 13C	287ccb8b-f3d7-4b29-b56a-a5985b186fab	CHMO:0000595 | 13C nuclear magnetic resonance spectroscopy (13C NMR)
	X17764	10.14272/ABTZHDQWMUXIFW-UHFFFAOYSA-N/CHMO0000470.3	CML-74B_MS	5217b48e-8912-4f0c-8bfd-7884cb43b3bf	CHMO:0000470 | mass spectrometry (MS)
	X17764	10.14272/ABTZHDQWMUXIFW-UHFFFAOYSA-N/CHMO0000630.2	CML-74B_IR	8689de49-4ac0-46d1-b967-0074c6dd850c	CHMO:0000630 | infrared absorption spectroscopy (IR)
CML-R74-A	X17765	Analysis was gained from two batches
	X17765	10.14272/XJGYBMKEUQIRGA-UHFFFAOYSA-N/CHMO0000593	CML-74 F26-31 1H	efc4a3e3-f24f-44d4-b028-cbc04b8301c0	CHMO:0000593 | 1H nuclear magnetic resonance spectroscopy (1H NMR)
	X17765	10.14272/XJGYBMKEUQIRGA-UHFFFAOYSA-N/CHMO0000596	CML-74 F26-31 90 DEPT	400c7033-1cb1-4526-b7db-8fff39dd1c48	CHMO:0000596 | distortionless enhancement with polarization transfer (DEPT)
	X17765	10.14272/XJGYBMKEUQIRGA-UHFFFAOYSA-N/CHMO0000596.1	CML-74 F26-31 135 DEPT	cee48fd9-182e-4545-b4c3-ee9b710d717c	CHMO:0000596 | distortionless enhancement with polarization transfer (DEPT)
	X17765	10.14272/XJGYBMKEUQIRGA-UHFFFAOYSA-N/CHMO0000595	CML-74 F26-31 13C	14af998b-8bf2-4295-9a31-214a2cc1d157	CHMO:0000595 | 13C nuclear magnetic resonance spectroscopy (13C NMR)
	X17765	10.14272/XJGYBMKEUQIRGA-UHFFFAOYSA-N/CHMO0000470	CML-74A_MS	86e061eb-686b-4620-9c20-7486a97e2489	CHMO:0000470 | mass spectrometry (MS)
	X17765	10.14272/XJGYBMKEUQIRGA-UHFFFAOYSA-N/CHMO0000630	CML-74A_IR	cb008bc2-25be-4f79-8501-729869680d1d	CHMO:0000630 | infrared absorption spectroscopy (IR)
	not available	10.14272/XJGYBMKEUQIRGA-UHFFFAOYSA-N/CHMO0001150	LSH-R441A_COSY	8ca50ebe-cc3e-4661-a61c-75934b2d65fb	CHMO:0001150 | 1H--1H correlation spectroscopy (1H-1H COSY)
	not available	10.14272/XJGYBMKEUQIRGA-UHFFFAOYSA-N/CHMO0001146	LSH-R441A_HSQC	3b6bfaa7-feb3-4d63-a93b-9ab1c6608bb4	CHMO:0001146 | 1H--13C heteronuclear single quantum coherence (1H-13C HSQC)
	not available	10.14272/XJGYBMKEUQIRGA-UHFFFAOYSA-N/CHMO0001075	LSH-R441A_EA	766c64fc-f59c-460f-ac95-d4af07211b0f	CHMO:0001075 | elemental analysis (EA)
	not available	10.14272/XJGYBMKEUQIRGA-UHFFFAOYSA-N/CHMO0000292	LSH-R441A_UV	8f285e66-2fb7-4a8f-83c1-bb0a942a0848	CHMO:0000292 | ultraviolet-visible spectrophotometry (UV-VIS)
CML-R41-A	X17141	Analysis was gained from two batches
	X17141	10.14272/SJXHLZCPDZPBPW-UHFFFAOYSA-N/CHMO0000593	CML-41 F2-7 1H_CDCl3	b1d0b429-0cf8-4112-ab9e-cfe8537b4ff1	CHMO:0000593 | 1H nuclear magnetic resonance spectroscopy (1H NMR)
	X17141	10.14272/SJXHLZCPDZPBPW-UHFFFAOYSA-N/CHMO0000630	CML-41 IR	cabcc16e-7e14-49db-9934-80ddb30ecbd5	CHMO:0000630 | infrared absorption spectroscopy (IR)
	X17141	10.14272/SJXHLZCPDZPBPW-UHFFFAOYSA-N/CHMO0000470	CML-41 MS	c47362ae-494c-4810-8917-c3853b2b75f3	CHMO:0000470 | mass spectrometry (MS)
	not available	10.14272/SJXHLZCPDZPBPW-UHFFFAOYSA-N/CHMO0000593.1	LSH-GM-R10_1H_DMSO	49f6efa4-cadc-40b0-956a-f02acba29d57	CHMO:0000593 | 1H nuclear magnetic resonance spectroscopy (1H NMR)
	not available	10.14272/SJXHLZCPDZPBPW-UHFFFAOYSA-N/CHMO0000595.1	LSH-GM-R10_13C_DMSO	e04321df-88c1-4079-ac44-2e9aef98f093	CHMO:0000595 | 13C nuclear magnetic resonance spectroscopy (13C NMR)
	not available	10.14272/SJXHLZCPDZPBPW-UHFFFAOYSA-N/CHMO0001146	LSH-GM-R10_HSQC_DMSO	0850854c-85a5-44ba-b805-9f4cae98963f	CHMO:0001146 | 1H--13C heteronuclear single quantum coherence (1H-13C HSQC)
	not available	10.14272/SJXHLZCPDZPBPW-UHFFFAOYSA-N/CHMO0001148	LSH-GM-R10_HMBC_DMSO	ade5462f-3484-4cdc-a855-9cf9a9285039	CHMO:0001148 | 1H--13C heteronuclear multiple bond coherence (13C-1H HMBC)
LSH-R203-A	X16022
	X16022	10.14272/FFRYUAVNPBUEIC-UHFFFAOYSA-N/CHMO0000593.1	LSH-R203A_1H	c692a469-01d3-49ea-81c9-957c8c7c69c5	CHMO:0000593 | 1H nuclear magnetic resonance spectroscopy (1H NMR)
	X16022	10.14272/FFRYUAVNPBUEIC-UHFFFAOYSA-N/CHMO0000595.1	LSH-R203A_13C	b3d63232-6090-4a40-9c23-6dac48907014	CHMO:0000595 | 13C nuclear magnetic resonance spectroscopy (13C NMR)
	X16022	10.14272/FFRYUAVNPBUEIC-UHFFFAOYSA-N/CHMO0000596	DEPT90	93bb50c0-8659-48ec-ab21-b7171912e9cf	CHMO:0000596 | distortionless enhancement with polarization transfer (DEPT)
	X16022	10.14272/FFRYUAVNPBUEIC-UHFFFAOYSA-N/CHMO0000470.2	LSH-R203A_MS	f7236b31-fe84-4705-bb35-6ea9dcb881b5	CHMO:0000470 | mass spectrometry (MS)
	X16022	10.14272/FFRYUAVNPBUEIC-UHFFFAOYSA-N/CHMO0000630.1	LSH-R203A_IR	fae80345-afd7-49f9-ad17-047528c8ee5a	CHMO:0000630 | infrared absorption spectroscopy (IR)
	X16022	10.14272/FFRYUAVNPBUEIC-UHFFFAOYSA-N/CHMO0000596.1	DEPT135	4c466e33-6b9e-4378-b618-cf2b2a62291e	CHMO:0000596 | distortionless enhancement with polarization transfer (DEPT)
JPK-R523-A	not available
	not available	10.14272/GAIYTCZAQRWQIX-UHFFFAOYSA-N/CHMO0000593	1H	7456cb60-470b-4c4f-971a-fd7091d54898	CHMO:0000593 | 1H nuclear magnetic resonance spectroscopy (1H NMR)
	not available	10.14272/GAIYTCZAQRWQIX-UHFFFAOYSA-N/CHMO0000595	13C	25f7e835-3385-427b-9e4e-1ae490055abe	CHMO:0000595 | 13C nuclear magnetic resonance spectroscopy (13C NMR)
	not available	10.14272/GAIYTCZAQRWQIX-UHFFFAOYSA-N/CHMO0000597	19F	4422618a-4913-4497-8981-6b4f5a9eb757	CHMO:0000597 | 19F nuclear magnetic resonance spectroscopy (19F NMR)
	not available	10.14272/GAIYTCZAQRWQIX-UHFFFAOYSA-N/CHMO0000470	Mass	5f8652a2-2098-4423-a5b3-8926e1221893	CHMO:0000470 | mass spectrometry (MS)
	not available	10.14272/GAIYTCZAQRWQIX-UHFFFAOYSA-N/CHMO0000630	IR	ee0424e8-c371-4427-8287-ca6c801fc5f8	CHMO:0000630 | infrared absorption spectroscopy (IR)
	not available	10.14272/GAIYTCZAQRWQIX-UHFFFAOYSA-N/CHMO0000596	DEPT90	4c769516-b1d9-4422-9562-616bca876b32	CHMO:0000596 | distortionless enhancement with polarization transfer (DEPT)
	not available	10.14272/GAIYTCZAQRWQIX-UHFFFAOYSA-N/CHMO0000596.1	DEPT135	44de4c89-b4f2-4ce3-abf6-8d72c59d1b72	CHMO:0000596 | distortionless enhancement with polarization transfer (DEPT)
	X16178	Material available from another batch
LSH-R54-A	X12532
	X12532	10.14272/PXDLUYLWPJMGJA-UHFFFAOYSA-N/CHMO0000630	LSH-R54_IR	13b27fd2-d1f4-4bd4-a3ec-c5aad1e07a08	CHMO:0000630 | infrared absorption spectroscopy (IR)
	X12532	10.14272/PXDLUYLWPJMGJA-UHFFFAOYSA-N/CHMO0000470	LSH-R54_MS	51258da6-c556-4c1d-b0fd-c7de7b18b2b8	CHMO:0000470 | mass spectrometry (MS)
	X12532	10.14272/PXDLUYLWPJMGJA-UHFFFAOYSA-N/CHMO0000595	LSH-R54A_13C	5f566ea0-dc30-4823-bf59-2d66d61db0e9	CHMO:0000595 | 13C nuclear magnetic resonance spectroscopy (13C NMR)
	X12532	10.14272/PXDLUYLWPJMGJA-UHFFFAOYSA-N/CHMO0000593	LSH-R54A_1H	ddf19e84-6f9c-4f49-ab39-9f44bdcdf7bc	CHMO:0000593 | 1H nuclear magnetic resonance spectroscopy (1H NMR)
LSH-R204-A	X16026
	X16026	10.14272/BYHVGQHIAFURIL-UHFFFAOYSA-N/CHMO0000593.1	LSH-R204A_1H	7e407454-315e-4492-8bd7-241d91d3e09a	CHMO:0000593 | 1H nuclear magnetic resonance spectroscopy (1H NMR)
	X16026	10.14272/BYHVGQHIAFURIL-UHFFFAOYSA-N/CHMO0000595.1	LSH-R204A_13C	d8872375-a1a9-4e53-88b2-5a7e670ce245	CHMO:0000595 | 13C nuclear magnetic resonance spectroscopy (13C NMR)
	X16026	10.14272/BYHVGQHIAFURIL-UHFFFAOYSA-N/CHMO0000470.2	LSH-R204A_MS	78536b7c-9332-442a-99c7-25fc1c6532e1	CHMO:0000470 | mass spectrometry (MS)
	X16026	10.14272/BYHVGQHIAFURIL-UHFFFAOYSA-N/CHMO0000630.1	LSH-R204A_IR	2d4bcbaf-ea1e-482b-9898-429b70e39bf5	CHMO:0000630 | infrared absorption spectroscopy (IR)
LSH-R44-A	X12521
	X12521	10.14272/SPSSDDOTEZKOOV-UHFFFAOYSA-N/CHMO0000593.1	LSH-R44_1H-NMR	69659484-92fb-4e57-856c-3c03c0061187	CHMO:0000593 | 1H nuclear magnetic resonance spectroscopy (1H NMR)
	X12521	10.14272/SPSSDDOTEZKOOV-UHFFFAOYSA-N/CHMO0000595.1	LSH-R44_13C-NMR	2c3197bf-68a2-4f3b-8033-30315b663195	CHMO:0000595 | 13C nuclear magnetic resonance spectroscopy (13C NMR)
	X12521	10.14272/SPSSDDOTEZKOOV-UHFFFAOYSA-N/CHMO0000630.1	LSH-R44_IR	4dbe88fc-cfbb-4c3e-93b9-e8c758b0131a	CHMO:0000630 | infrared absorption spectroscopy (IR)
	X12521	10.14272/SPSSDDOTEZKOOV-UHFFFAOYSA-N/CHMO0000470.1	LSH-R44_EI-MS	6c66d689-3644-4585-bddf-040996e7211c	CHMO:0000470 | mass spectrometry (MS)
	X12521	10.14272/SPSSDDOTEZKOOV-UHFFFAOYSA-N/CHMO0000498.1	LSH-R44_HRMS	c84ae255-1946-4028-beb6-35526d557706	CHMO:0000498 | high-resolution mass spectrometry (HRMS)
LSH-R53-A	X12522
	X12522	10.14272/BMIMNRPAEPIYDN-UHFFFAOYSA-N/CHMO0000630	LSH-R53_IR	b440aa73-2b1c-49fa-b8d6-ff3cb1aad4ef	CHMO:0000630 | infrared absorption spectroscopy (IR)
	X12522	10.14272/BMIMNRPAEPIYDN-UHFFFAOYSA-N/CHMO0000593	LSH-R53A_1H	4357d058-bda9-4fb0-b3c7-76add852eb0b	CHMO:0000593 | 1H nuclear magnetic resonance spectroscopy (1H NMR)
	X12522	10.14272/BMIMNRPAEPIYDN-UHFFFAOYSA-N/CHMO0000595	LSH-R53A_13C	3d22571a-2047-44a6-9de1-83af8883ddf0	CHMO:0000595 | 13C nuclear magnetic resonance spectroscopy (13C NMR)
	X12522	10.14272/BMIMNRPAEPIYDN-UHFFFAOYSA-N/CHMO0000470	LSH-R53A_MS	10edf009-0c7c-4504-a182-4a8036b2f681	CHMO:0000470 | mass spectrometry (MS)
	X12522	10.14272/BMIMNRPAEPIYDN-UHFFFAOYSA-N/CHMO0000498	LSH-R53A_HRMS	a5d4ff3f-4ec6-464b-9f83-084927412aa6	CHMO:0000498 | high-resolution mass spectrometry (HRMS)
JPK-R14-A	X11411
	X11411	10.14272/KPGPIQKEKAEAHM-UHFFFAOYSA-N/1HNMR.1	1H	ccb28c35-05f7-4632-9aa6-539d9218acc4	CHMO:0000593 | 1H nuclear magnetic resonance spectroscopy (1H NMR)
	X11411	10.14272/KPGPIQKEKAEAHM-UHFFFAOYSA-N/Mass.1	Mass	d8ac636c-93fb-4d15-a57f-6575a419bf72	CHMO:0000470 | mass spectrometry (MS)
	X11411	10.14272/KPGPIQKEKAEAHM-UHFFFAOYSA-N/13CNMR.1	13C	40df98be-5ada-4a14-9489-744e0edad958	CHMO:0000595 | 13C nuclear magnetic resonance spectroscopy (13C NMR)
	X11411	10.14272/KPGPIQKEKAEAHM-UHFFFAOYSA-N/IR.1	IR	99062165-c905-4c62-8d7c-481dd2735250	CHMO:0000630 | infrared absorption spectroscopy (IR)
JPK-R5-A	X11154
	X11154	10.14272/ZBBQSGVRBQKLLE-UHFFFAOYSA-N/CHMO0000593	1H	64c24ff5-dbb3-41b8-b792-6b0b2674ef28	CHMO:0000593 | 1H nuclear magnetic resonance spectroscopy (1H NMR)
	X11154	10.14272/ZBBQSGVRBQKLLE-UHFFFAOYSA-N/CHMO0000595	13C	ed1d8599-2d88-400e-9993-2fe5e309f508	CHMO:0000595 | 13C nuclear magnetic resonance spectroscopy (13C NMR)
	X11154	10.14272/ZBBQSGVRBQKLLE-UHFFFAOYSA-N/CHMO0000470	Mass	05c1a796-2dcd-46a5-b33a-c73c10ae1ea5	CHMO:0000470 | mass spectrometry (MS)
	X11154	10.14272/ZBBQSGVRBQKLLE-UHFFFAOYSA-N/CHMO0000630	IR	ee06697a-c119-4816-9950-e2c5ab680655	CHMO:0000630 | infrared absorption spectroscopy (IR)
LSH-R112-A	not available	Analysis was gained from two batches
	not available	10.14272/KOWYBYDSUFDMGG-UHFFFAOYSA-N/CHMO0000593	LSH-R160A_1H	0aea97cc-7fbd-43fc-bcfc-e365d93d11e5	CHMO:0000593 | 1H nuclear magnetic resonance spectroscopy (1H NMR)
	not available	10.14272/KOWYBYDSUFDMGG-UHFFFAOYSA-N/CHMO0000595	LSH-R160A_13C	0e5b92b0-a4f4-4236-be4b-dab9f71bc0bc	CHMO:0000595 | 13C nuclear magnetic resonance spectroscopy (13C NMR)
	X15664	10.14272/KOWYBYDSUFDMGG-UHFFFAOYSA-N/CHMO0000470	LSH-R164A_MS	5fc10cde-94f3-4db7-b8cb-86778ed458c4	CHMO:0000470 | mass spectrometry (MS)
	X15664	10.14272/KOWYBYDSUFDMGG-UHFFFAOYSA-N/CHMO0000630	LSH-R164A_IR	7ae71889-cd62-4bd1-b0cd-b354fd6ba8f5	CHMO:0000630 | infrared absorption spectroscopy (IR)
	not available	10.14272/KOWYBYDSUFDMGG-UHFFFAOYSA-N/CHMO0000596	LSH-R160A_DEPT	98b8c1ff-b5e4-4562-83cd-46804d3fad33	CHMO:0000596 | distortionless enhancement with polarization transfer (DEPT)
